# Supplementary material
Source: PubMed Central journal article supplement (PMC9452341)
Supplement: ajtr0014-5833-f7.pdf [file ajtr0014-5833-f7.pdf]

# Bioinformatics analysis of membranous nephropathy

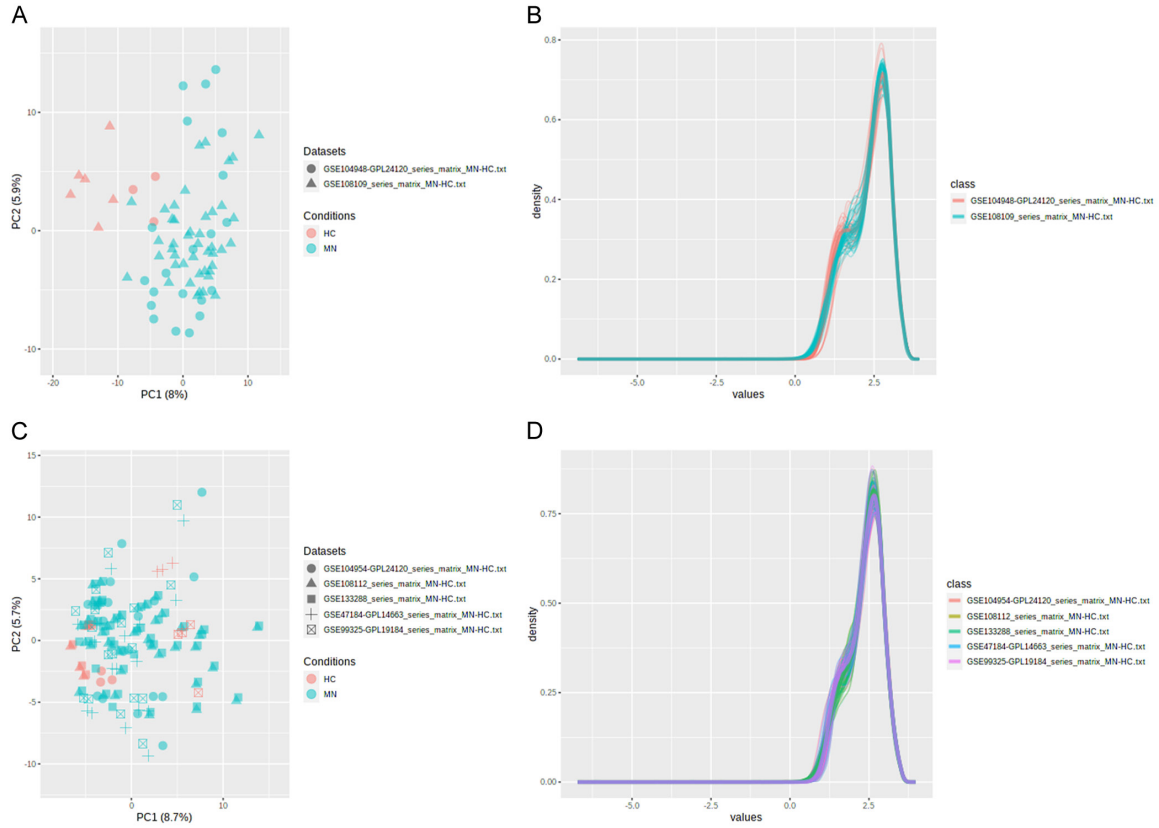

**Supplementary Figure 1.** PCA plots and density plots. NetworkAnalyst was used to integrate gene expression profiles, and PCA plot (A) and density plot (B) of glomerulus, and PCA plot (C) and density plot (D) of renal tubules were drawn. The farther the distance between points or lines in the graph, the greater the difference between the suggested data.

## Bioinformatics analysis of membranous nephropathy

**Supplementary Table 1.** The DEGs in the glomerulus, renal tubules and PBMCs of MN

| Position   | Gene      | Gene title                                                       |
|------------|-----------|------------------------------------------------------------------|
| Glomerulus | ECM1      | extracellular matrix protein 1                                   |
|            | MYOZ2     | myozenin 2                                                       |
|            | BMP2      | bone morphogenetic protein 2                                     |
|            | FSCN1     | fascin actin-bundling protein 1                                  |
|            | ZYX       | zyxin                                                            |
|            | TCIM      | transcriptional and immune response regulator                    |
|            | CCND1     | cyclin D1                                                        |
|            | ARPC1B    | actin related protein 2/3 complex subunit 1B                     |
|            | IGFBP2    | insulin like growth factor binding protein 2                     |
|            | TMOD1     | tropomodulin 1                                                   |
|            | RAB31     | RAB31, member RAS oncogene family                                |
|            | LRP10     | LDL receptor related protein 10                                  |
|            | ADM       | adrenomedullin                                                   |
|            | PLD3      | phospholipase D family member 3                                  |
|            | WFS1      | wolframin ER transmembrane glycoprotein                          |
|            | ADGRE5    | adhesion G protein-coupled receptor E5                           |
|            | ARHGEF15  | Rho guanine nucleotide exchange factor 15                        |
|            | AXL       | AXL receptor tyrosine kinase                                     |
|            | PLEKH01   | pleckstrin homology domain containing 01                         |
|            | KIAA0040  | KIAA0040                                                         |
|            | DAAM2     | dishevelled associated activator of morphogenesis 2              |
|            | TBXA2R    | thromboxane A2 receptor                                          |
|            | HLX       | H2.O like homeobox                                               |
|            | PGAP6     | post-glycosylphosphatidylinositol attachment to proteins 6       |
|            | APLNR     | apelin receptor                                                  |
|            | DOCK6     | dedicator of cytokinesis 6                                       |
|            | BAMBI     | BMP and activin membrane bound inhibitor                         |
|            | MYO1C     | myosin IC                                                        |
|            | TNFRSF12A | TNF receptor superfamily member 12A                              |
|            | TMEM39B   | transmembrane protein 39B                                        |
|            | RRBP1     | ribosome binding protein 1                                       |
|            | LRRC32    | leucine rich repeat containing 32                                |
|            | SEMA7A    | semaphorin 7A (John Milton Hagen blood group)                    |
|            | NES       | nestin                                                           |
|            | TRPC6     | transient receptor potential cation channel subfamily C member 6 |
|            | H2BC21    | H2B clustered histone 21                                         |
|            | KDEL3     | KDEL endoplasmic reticulum protein retention receptor 3          |
|            | ANXA1     | annexin A1                                                       |
|            | JCAD      | junctional cadherin 5 associated                                 |
|            | RUSC2     | RUN and SH3 domain containing 2                                  |
|            | HDAC5     | histone deacetylase 5                                            |
|            | MCAM      | melanoma cell adhesion molecule                                  |
|            | GATA3     | GATA binding protein 3                                           |
|            | KIRREL1   | kirre like nephrin family adhesion molecule 1                    |
|            | BGN       | biglycan                                                         |
|            | SDC3      | syndecan 3                                                       |
|            | TMEM45A   | transmembrane protein 45A                                        |
|            | ELK3      | ETS transcription factor ELK3                                    |
|            | ATP13A2   | ATPase cation transporting 13A2                                  |
|            | HBB       | hemoglobin subunit beta                                          |
|            | GPR4      | G protein-coupled receptor 4                                     |

## Bioinformatics analysis of membranous nephropathy

|          |                                                              |
|----------|--------------------------------------------------------------|
| TIMP1    | TIMP metalloproteinase inhibitor 1                           |
| RELA     | RELA proto-oncogene, NF- $\kappa$ B subunit                  |
| GADD45A  | growth arrest and DNA damage inducible alpha                 |
| CAVIN1   | caveolae associated protein 1                                |
| HK2      | hexokinase 2                                                 |
| FGFR1    | fibroblast growth factor receptor 1                          |
| NOTCH1   | notch receptor 1                                             |
| KCTD12   | potassium channel tetramerization domain containing 12       |
| BST2     | bone marrow stromal cell antigen 2                           |
| GNA11    | G protein subunit alpha 11                                   |
| MYO9B    | myosin IXB                                                   |
| CENPB    | centromere protein B                                         |
| PEA15    | proliferation and apoptosis adaptor protein 15               |
| OAS1     | 2'-5'-oligoadenylate synthetase 1                            |
| FCER1G   | Fc fragment of IgE receptor Ig                               |
| SLC35F6  | solute carrier family 35 member F6                           |
| EFNB1    | ephrin B1                                                    |
| SEMA4G   | semaphorin 4G                                                |
| ST3GAL2  | ST3 beta-galactoside alpha-2,3-sialyltransferase 2           |
| MAP4K2   | mitogen-activated protein kinase kinase kinase kinase 2      |
| TAPBP    | TAP binding protein                                          |
| SLC9A3R2 | SLC9A3 regulator 2                                           |
| ENC1     | ectodermal-neural cortex 1                                   |
| STN1     | STN1 subunit of CST complex                                  |
| CCDC85C  | coiled-coil domain containing 85C                            |
| TAGLN2   | transgelin 2                                                 |
| MFNG     | MFNG O-fucosylpeptide 3-beta-N-acetylglucosaminyltransferase |
| CD151    | CD151 molecule (Raph blood group)                            |
| TGFB1    | transforming growth factor beta 1                            |
| NFATC1   | nuclear factor of activated T cells 1                        |
| CDK2AP2  | cyclin dependent kinase 2 associated protein 2               |
| DDA1     | DET1 and DDB1 associated 1                                   |
| SYT11    | synaptotagmin 11                                             |
| JPT1     | Jupiter microtubule associated homolog 1                     |
| SPN      | sialophorin                                                  |
| PRAF2    | PRA1 domain family member 2                                  |
| DAG1     | dystroglycan 1                                               |
| CRELD2   | cysteine rich with EGF like domains 2                        |
| ITGA5    | integrin subunit alpha 5                                     |
| TMEM184B | transmembrane protein 184B                                   |
| ADAM15   | ADAM metalloproteinase domain 15                             |
| IQSEC1   | IQ motif and Sec7 domain ArfGEF 1                            |
| TP53     | tumor protein p53                                            |
| SLC37A4  | solute carrier family 37 member 4                            |
| ZNF189   | zinc finger protein 189                                      |
| SRSF5    | serine and arginine rich splicing factor 5                   |
| MAOA     | monoamine oxidase A                                          |
| OGT      | O-linked N-acetylglucosamine (GlcNAc) transferase            |
| AASS     | aminoadipate-semialdehyde synthase                           |
| FRAS1    | Fraser extracellular matrix complex subunit 1                |
| CYP27B1  | cytochrome P450 family 27 subfamily B member 1               |
| PDK4     | pyruvate dehydrogenase kinase 4                              |
| HBB      | hemoglobin subunit beta                                      |

Tubules

## Bioinformatics analysis of membranous nephropathy

|         |                                                                                 |
|---------|---------------------------------------------------------------------------------|
| SLC29A3 | solute carrier family 29 member 3                                               |
| FZD1    | frizzled class receptor 1                                                       |
| MYLIP   | myosin regulatory light chain interacting protein                               |
| CAPN3   | calpain 3                                                                       |
| B4GALT5 | beta-1,4-galactosyltransferase 5                                                |
| FHL3    | four and a half LIM domains 3                                                   |
| ABCG1   | ATP binding cassette subfamily G member 1                                       |
| AKR7A3  | aldo-keto reductase family 7 member A3                                          |
| NREP    | neuronal regeneration related protein                                           |
| LIME1   | Lck interacting transmembrane adaptor 1                                         |
| CCND1   | cyclin D1                                                                       |
| FMO1    | flavin containing dimethylaniline monooxygenase 1                               |
| ABHD6   | abhydrolase domain containing 6, acylglycerol lipase                            |
| PIPOX   | pipecolic acid and sarcosine oxidase                                            |
| CITED2  | Cbp/p300 interacting transactivator with Glu/Asp rich carboxy-terminal domain 2 |
| PIK3R3  | phosphoinositide-3-kinase regulatory subunit 3                                  |
| DAO     | D-amino acid oxidase                                                            |
| HNF1B   | HNF1 homeobox B                                                                 |
| RBM47   | RNA binding motif protein 47                                                    |
| PCK2    | phosphoenolpyruvate carboxykinase 2, mitochondrial                              |
| PDZD2   | PDZ domain containing 2                                                         |
| XPNPEP2 | X-prolyl aminopeptidase 2                                                       |
| CYP4F2  | cytochrome P450 family 4 subfamily F member 2                                   |
| KDM4A   | lysine demethylase 4A                                                           |
| FAM168B | family with sequence similarity 168 member B                                    |
| HMGCL   | 3-hydroxy-3-methylglutaryl-CoA lyase                                            |
| GLYAT   | glycine-N-acyltransferase                                                       |
| KMO     | kynurenine 3-monooxygenase                                                      |
| DDC     | dopa decarboxylase                                                              |
| CROT    | carnitine O-octanoyltransferase                                                 |
| MXD4    | MAX dimerization protein 4                                                      |
| FBP1    | fructose-bisphosphatase 1                                                       |
| NR2F2   | nuclear receptor subfamily 2 group F member 2                                   |
| FABP1   | fatty acid binding protein 1                                                    |
| PAH     | phenylalanine hydroxylase                                                       |
| SLC22A2 | solute carrier family 22 member 2                                               |
| CRCP    | CGRP receptor component                                                         |
| ILVBL   | ilvB acetolactate synthase like                                                 |
| C1orf56 | chromosome 1 open reading frame 56                                              |
| CCDC51  | coiled-coil domain containing 51                                                |
| HADH    | hydroxyacyl-CoA dehydrogenase                                                   |
| GATM    | glycine amidinotransferase                                                      |
| DDX10   | DEAD-box helicase 10                                                            |
| AMOT    | angiomin                                                                        |
| METTL7A | methyltransferase like 7A                                                       |
| IDH1    | isocitrate dehydrogenase (NADP(+)) 1                                            |
| LGALS1  | galectin 1                                                                      |
| ECHDC3  | enoyl-CoA hydratase domain containing 3                                         |
| TRIAP1  | TP53 regulated inhibitor of apoptosis 1                                         |
| COLEC11 | collectin subfamily member 11                                                   |
| ALDOB   | aldolase, fructose-bisphosphate B                                               |
| GUCY1B1 | guanylate cyclase 1 soluble subunit beta 1                                      |
| C2CD2   | C2 calcium dependent domain containing 2                                        |

## Bioinformatics analysis of membranous nephropathy

|          |                                                     |
|----------|-----------------------------------------------------|
| CTDSP1   | CTD small phosphatase 1                             |
| AQP1     | aquaporin 1 (Colton blood group)                    |
| HPD      | 4-hydroxyphenylpyruvate dioxygenase                 |
| SCARB1   | scavenger receptor class B member 1                 |
| GOLPH3L  | golgi phosphoprotein 3 like                         |
| GNPDA1   | glucosamine-6-phosphate deaminase 1                 |
| FLRT3    | fibronectin leucine rich transmembrane protein 3    |
| NAT8B    | N-acetyltransferase 8B (putative, gene/pseudogene)  |
| UBN1     | ubiquitin 1                                         |
| AKR7A2   | aldo-keto reductase family 7 member A2              |
| MSRB1    | methionine sulfoxide reductase B1                   |
| PTH1R    | parathyroid hormone 1 receptor                      |
| CALML4   | calmodulin like 4                                   |
| VAV3     | vav guanine nucleotide exchange factor 3            |
| HAO2     | hydroxyacid oxidase 2                               |
| NQO2     | N-ribosyl-dihydro-nicotinamide:quinone reductase 2  |
| CST3     | cystatin C                                          |
| LPCAT3   | lysophosphatidylcholine acyltransferase 3           |
| TNFSF10  | TNF superfamily member 10                           |
| GPD1     | glycerol-3-phosphate dehydrogenase 1                |
| RNH1     | ribonuclease/angiogenin inhibitor 1                 |
| GATAD2A  | GATA zinc finger domain containing 2A               |
| NPR3     | natriuretic peptide receptor 3                      |
| TDP2     | tyrosyl-DNA phosphodiesterase 2                     |
| ZGPAT    | zinc finger CCCH-type and G-patch domain containing |
| STAP2    | signal transducing adaptor family member 2          |
| GJB1     | gap junction protein beta 1                         |
| PLXNB1   | plexin B1                                           |
| UPB1     | beta-ureidopropionase 1                             |
| TMEM242  | transmembrane protein 242                           |
| CD320    | CD320 molecule                                      |
| FUT3     | fucosyltransferase 3 (Lewis blood group)            |
| GCHFR    | GTP cyclohydrolase I feedback regulator             |
| EPHX2    | epoxide hydrolase 2                                 |
| GPX4     | glutathione peroxidase 4                            |
| G6PC     | glucose-6-phosphatase catalytic subunit 1           |
| QDPR     | quinoid dihydropteridine reductase                  |
| ATP6V0E2 | ATPase H <sup>+</sup> transporting V0 subunit e2    |
| RETSAT   | retinol saturase                                    |
| ALDH3A2  | aldehyde dehydrogenase 3 family member A2           |
| ACOT13   | acyl-CoA thioesterase 13                            |
| CRYL1    | crystallin lambda 1                                 |
| COL3A1   | collagen type III alpha 1 chain                     |
| RNPEPL1  | arginyl aminopeptidase like 1                       |
| DGLUCY   | D-glutamate cyclase                                 |
| ASS1     | argininosuccinate synthase 1                        |
| LRRRC8D  | leucine rich repeat containing 8 VRAC subunit D     |
| TMEM159  | lipid droplet assembly factor 1                     |
| HDAC5    | histone deacetylase 5                               |
| MRPL57   | mitochondrial ribosomal protein L57                 |
| BPHL     | biphenyl hydrolase like                             |
| PATZ1    | POZ/BTB and AT hook containing zinc finger 1        |
| MASP1    | MBL associated serine protease 1                    |

## Bioinformatics analysis of membranous nephropathy

|           |                                                                 |
|-----------|-----------------------------------------------------------------|
| COBL      | cordon-bleu WH2 repeat protein                                  |
| MYDGF     | myeloid derived growth factor                                   |
| HDAC6     | histone deacetylase 6                                           |
| MID1IP1   | MID1 interacting protein 1                                      |
| FUT6      | fucosyltransferase 6                                            |
| STX7      | syntaxin 7                                                      |
| CUBN      | cubilin                                                         |
| DHTKD1    | dehydrogenase E1 and transketolase domain containing 1          |
| SLC7A9    | solute carrier family 7 member 9                                |
| PEPD      | peptidase D                                                     |
| GTF2H5    | general transcription factor IIH subunit 5                      |
| CYP4A11   | cytochrome P450 family 4 subfamily A member 11                  |
| AGPAT1    | 1-acylglycerol-3-phosphate O-acyltransferase 1                  |
| OAZ2      | ornithine decarboxylase antizyme 2                              |
| KHK       | ketoheokinase                                                   |
| MMUT      | methylmalonyl-CoA mutase                                        |
| REXO4     | REX4 homolog, 3'-5' exonuclease                                 |
| TRAM2     | translocation associated membrane protein 2                     |
| PPP6R1    | protein phosphatase 6 regulatory subunit 1                      |
| CBR4      | carbonyl reductase 4                                            |
| OGG1      | 8-oxoguanine DNA glycosylase                                    |
| GLDC      | glycine decarboxylase                                           |
| GUCY1A1   | guanylate cyclase 1 soluble subunit alpha 1                     |
| CCNG2     | cyclin G2                                                       |
| PCGF2     | polycomb group ring finger 2                                    |
| DOLPP1    | dolichyldiphosphatase 1                                         |
| MAN2B1    | mannosidase alpha class 2B member 1                             |
| FKBP2     | FKBP prolyl isomerase 2                                         |
| PLG       | plasminogen                                                     |
| APOM      | apolipoprotein M                                                |
| ECI2      | enoyl-CoA delta isomerase 2                                     |
| PGAP2     | post-GPI attachment to proteins 2                               |
| ZNF106    | zinc finger protein 106                                         |
| FOLR1     | folate receptor alpha                                           |
| TCTN1     | tectonic family member 1                                        |
| STX5      | syntaxin 5                                                      |
| PNP       | purine nucleoside phosphorylase                                 |
| CLDN10    | claudin 10                                                      |
| CFDP1     | craniofacial development protein 1                              |
| TBC1D17   | TBC1 domain family member 17                                    |
| RBKS      | ribokinase                                                      |
| TNFRSF11B | TNF receptor superfamily member 11b                             |
| LIAS      | lipoic acid synthetase                                          |
| EPHB4     | EPH receptor B4                                                 |
| C1S       | complement C1s                                                  |
| SERPINE2  | serpin family E member 2                                        |
| NFIX      | nuclear factor I X                                              |
| VEGFB     | vascular endothelial growth factor B                            |
| KEAP1     | kelch like ECH associated protein 1                             |
| EXTL2     | exostosin like glycosyltransferase 2                            |
| SMUG1     | single-strand-selective monofunctional uracil-DNA glycosylase 1 |
| IL10RB    | interleukin 10 receptor subunit beta                            |
| POP5      | POP5 homolog, ribonuclease P/MRP subunit                        |

## Bioinformatics analysis of membranous nephropathy

|          |                                                                          |
|----------|--------------------------------------------------------------------------|
| SHMT1    | serine hydroxymethyltransferase 1                                        |
| BEND5    | BEN domain containing 5                                                  |
| RIDA     | reactive intermediate imine deaminase A homolog                          |
| KLHL24   | kelch like family member 24                                              |
| STX3     | syntaxin 3                                                               |
| IGFBP4   | insulin like growth factor binding protein 4                             |
| TTC38    | tetratricopeptide repeat domain 38                                       |
| ZNF302   | zinc finger protein 302                                                  |
| NECAP2   | NECAP endocytosis associated 2                                           |
| RMND1    | required for meiotic nuclear division 1 homolog                          |
| HIBCH    | 3-hydroxyisobutyryl-CoA hydrolase                                        |
| RFXANK   | regulatory factor X associated ankyrin containing protein                |
| ACE2     | angiotensin converting enzyme 2                                          |
| DNASE1L3 | deoxyribonuclease 1 like 3                                               |
| POLE3    | DNA polymerase epsilon 3, accessory subunit                              |
| ABAT     | 4-aminobutyrate aminotransferase                                         |
| OGDHL    | oxoglutarate dehydrogenase L                                             |
| TMEM63A  | transmembrane protein 63A                                                |
| SLC22A6  | solute carrier family 22 member 6                                        |
| HOMER3   | homer scaffold protein 3                                                 |
| CDK4     | cyclin dependent kinase 4                                                |
| PHYH     | phytanoyl-CoA 2-hydroxylase                                              |
| PPIL2    | peptidylprolyl isomerase like 2                                          |
| BGN      | biglycan                                                                 |
| ALAD     | aminolevulinate dehydratase                                              |
| DTX4     | deltex E3 ubiquitin ligase 4                                             |
| CAT      | catalase                                                                 |
| SUGCT    | succinyl-CoA: glutarate-CoA transferase                                  |
| SPOP     | speckle type BTB/POZ protein                                             |
| TGFBRAP1 | transforming growth factor beta receptor associated protein 1            |
| ARPC1B   | actin related protein 2/3 complex subunit 1B                             |
| ALDH5A1  | aldehyde dehydrogenase 5 family member A1                                |
| FBXO17   | F-box protein 17                                                         |
| GNG11    | G protein subunit gamma 11                                               |
| GM2A     | GM2 ganglioside activator                                                |
| EHMT2    | euchromatic histone lysine methyltransferase 2                           |
| NIT2     | nitrilase family member 2                                                |
| TNFRSF21 | TNF receptor superfamily member 21                                       |
| MAPT     | microtubule associated protein tau                                       |
| MAN1B1   | mannosidase alpha class 1B member 1                                      |
| SSR4     | signal sequence receptor subunit 4                                       |
| S100A1   | S100 calcium binding protein A1                                          |
| PSPH     | phosphoserine phosphatase                                                |
| GLS      | glutaminase                                                              |
| GLE1     | GLE1 RNA export mediator                                                 |
| TPGS2    | tubulin polyglutamylase complex subunit 2                                |
| NAT8     | N-acetyltransferase 8 (putative)                                         |
| LEPROT   | leptin receptor overlapping transcript                                   |
| CD151    | CD151 molecule (Raph blood group)                                        |
| MGAT4B   | alpha-1,3-mannosyl-glycoprotein 4-beta-N-acetylglucosaminyltransferase B |
| ABCA1    | ATP binding cassette subfamily A member 1                                |
| ENAH     | ENAH actin regulator                                                     |
| MSRA     | methionine sulfoxide reductase A                                         |

## Bioinformatics analysis of membranous nephropathy

|          |                                                             |
|----------|-------------------------------------------------------------|
| KDELR1   | KDEL endoplasmic reticulum protein retention receptor 1     |
| COL18A1  | collagen type XVIII alpha 1 chain                           |
| KCNJ15   | potassium inwardly rectifying channel subfamily J member 15 |
| RAB32    | RAB32, member RAS oncogene family                           |
| ISCA1    | iron-sulfur cluster assembly 1                              |
| PRRC2A   | proline rich coiled-coil 2A                                 |
| FMO4     | flavin containing dimethylaniline monooxygenase 4           |
| EHHADH   | enoyl-CoA hydratase and 3-hydroxyacyl CoA dehydrogenase     |
| NUPR1    | nuclear protein 1, transcriptional regulator                |
| TBC1D19  | TBC1 domain family member 19                                |
| C2orf42  | chromosome 2 open reading frame 42                          |
| PXMP2    | peroxisomal membrane protein 2                              |
| CAMK2G   | calcium/calmodulin dependent protein kinase II gamma        |
| ARMT1    | acidic residue methyltransferase 1                          |
| KDM6B    | lysine demethylase 6B                                       |
| TP53     | tumor protein p53                                           |
| IGFBP6   | insulin like growth factor binding protein 6                |
| GBA3     | glucosylceramidase beta 3 (gene/pseudogene)                 |
| ATP6V1B2 | ATPase H <sup>+</sup> transporting V1 subunit B2            |
| NOP2     | NOP2 nucleolar protein                                      |
| PC       | pyruvate carboxylase                                        |
| ABHD10   | abhydrolase domain containing 10, depalmitoylase            |
| ATF7IP   | activating transcription factor 7 interacting protein       |
| CAPG     | capping actin protein, gelsolin like                        |
| INTS1    | integrator complex subunit 1                                |
| PEBP1    | phosphatidylethanolamine binding protein 1                  |
| PLEKHJ1  | pleckstrin homology domain containing J1                    |
| THBS1    | thrombospondin 1                                            |
| PALB2    | partner and localizer of BRCA2                              |
| DNAJB2   | DnaJ heat shock protein family (Hsp40) member B2            |
| NAXD     | NAD(P)HX dehydratase                                        |
| APOC1    | apolipoprotein C1                                           |
| NDUFS7   | NADH: ubiquinone oxidoreductase core subunit S7             |
| ANK3     | ankyrin 3                                                   |
| SORBS2   | sorbin and SH3 domain containing 2                          |
| HDHD5    | haloacid dehalogenase like hydrolase domain containing 5    |
| PTOV1    | PTOV1 extended AT-hook containing adaptor protein           |
| DNAJC6   | DnaJ heat shock protein family (Hsp40) member C6            |
| GPR137B  | G protein-coupled receptor 137B                             |
| TRIM8    | tripartite motif containing 8                               |
| CA4      | carbonic anhydrase 4                                        |
| ADI1     | acireductone dioxygenase 1                                  |
| CLCN5    | chloride voltage-gated channel 5                            |
| NMRK1    | nicotinamide riboside kinase 1                              |
| RNASEL   | ribonuclease L                                              |
| HCFC1R1  | host cell factor C1 regulator 1                             |
| DEXI     | Dexi homolog                                                |
| SLC47A1  | solute carrier family 47 member 1                           |
| PPP1R3C  | protein phosphatase 1 regulatory subunit 3C                 |
| SLC25A38 | solute carrier family 25 member 38                          |
| RAB2A    | RAB2A, member RAS oncogene family                           |
| MPDZ     | multiple PDZ domain crumbs cell polarity complex component  |
| HOXB7    | homeobox B7                                                 |



## Bioinformatics analysis of membranous nephropathy

|          |                                                                     |
|----------|---------------------------------------------------------------------|
| PDZD3    | PDZ domain containing 3                                             |
| RNF167   | ring finger protein 167                                             |
| BRD3OS   | BRD3 opposite strand                                                |
| ALDH2    | aldehyde dehydrogenase 2 family member                              |
| RENBP    | renin binding protein                                               |
| ZNF816   | zinc finger protein 816                                             |
| ZFP36L1  | ZFP36 ring finger protein like 1                                    |
| SLC25A1  | solute carrier family 25 member 1                                   |
| FAN1     | FANCD2 and FANCI associated nuclease 1                              |
| PDK2     | pyruvate dehydrogenase kinase 2                                     |
| MAOB     | monoamine oxidase B                                                 |
| ZYX      | zyxin                                                               |
| POLR3B   | RNA polymerase III subunit B                                        |
| DIO1     | iodothyronine deiodinase 1                                          |
| CBX6     | chromobox 6                                                         |
| SLC22A13 | solute carrier family 22 member 13                                  |
| PPCS     | phosphopantothencysteine synthetase                                 |
| SUOX     | sulfite oxidase                                                     |
| FAM174C  | family with sequence similarity 174 member C                        |
| ARL6IP5  | ADP ribosylation factor like GTPase 6 interacting protein 5         |
| RRAGC    | Ras related GTP binding C                                           |
| SLC2A5   | solute carrier family 2 member 5                                    |
| SIVA1    | SIVA1 apoptosis inducing factor                                     |
| EHD2     | EH domain containing 2                                              |
| PPDPF    | pancreatic progenitor cell differentiation and proliferation factor |
| FAM98A   | family with sequence similarity 98 member A                         |
| LLGL2    | LLGL scribble cell polarity complex component 2                     |
| ZNF592   | zinc finger protein 592                                             |
| NEU1     | neuraminidase 1                                                     |
| AMBRA1   | autophagy and beclin 1 regulator 1                                  |
| AMZ2     | archaelysin family metallopeptidase 2                               |
| PTER     | phosphotriesterase related                                          |
| DYRK1B   | dual specificity tyrosine phosphorylation regulated kinase 1B       |
| DIP2C    | disco interacting protein 2 homolog C                               |
| MTMR4    | myotubularin related protein 4                                      |
| SERPINI1 | serpin family I member 1                                            |
| AKR1A1   | aldo-keto reductase family 1 member A1                              |
| MLXIP    | MLX interacting protein                                             |
| WLS      | Wnt ligand secretion mediator                                       |
| MAZ      | MYC associated zinc finger protein                                  |
| TNFSF15  | TNF superfamily member 15                                           |
| PBLD     | phenazine biosynthesis like protein domain containing               |
| SLC25A10 | solute carrier family 25 member 10                                  |
| TIMM13   | translocase of inner mitochondrial membrane 13                      |
| ADH5     | alcohol dehydrogenase 5 (class III), chi polypeptide                |
| ACADM    | acyl-CoA dehydrogenase medium chain                                 |
| MAFF     | MAF bZIP transcription factor F                                     |
| PLPP3    | phospholipid phosphatase 3                                          |
| APH1B    | aph-1 homolog B, gamma-secretase subunit                            |
| VAMP5    | vesicle associated membrane protein 5                               |
| FADS3    | fatty acid desaturase 3                                             |
| CDKN1C   | cyclin dependent kinase inhibitor 1C                                |
| CYP51A1  | cytochrome P450 family 51 subfamily A member 1                      |

## Bioinformatics analysis of membranous nephropathy

|          |                                                          |
|----------|----------------------------------------------------------|
| GSDMD    | gasdermin D                                              |
| SPAG4    | sperm associated antigen 4                               |
| C3       | complement C3                                            |
| PSMB9    | proteasome 20S subunit beta 9                            |
| STARD13  | StAR related lipid transfer domain containing 13         |
| SLC20A1  | solute carrier family 20 member 1                        |
| DOP1A    | DOP1 leucine zipper like protein A                       |
| BHLHE40  | basic helix-loop-helix family member e40                 |
| TRMT11   | tRNA methyltransferase 11 homolog                        |
| P3H2     | prolyl 3-hydroxylase 2                                   |
| NFASC    | neurofascin                                              |
| CDK2AP1  | cyclin dependent kinase 2 associated protein 1           |
| MON2     | MON2 homolog, regulator of endosome-to-Golgi trafficking |
| TBC1D8   | TBC1 domain family member 8                              |
| RARRES2  | retinoic acid receptor responder 2                       |
| SERPINE1 | serpin family E member 1                                 |
| RALGAPA1 | Ral GTPase activating protein catalytic subunit alpha 1  |
| SLC31A2  | solute carrier family 31 member 2                        |
| PDCD6IP  | programmed cell death 6 interacting protein              |
| ADM      | adrenomedullin                                           |
| TAS2R3   | taste 2 receptor member 3                                |
| CHD1     | chromodomain helicase DNA binding protein 1              |
| MIR22HG  | MIR22 host gene                                          |
| TAP1     | transporter 1, ATP binding cassette subfamily B member   |
| FKBP1B   | FKBP prolyl isomerase 1B                                 |
| TRIP10   | thyroid hormone receptor interactor 10                   |
| SLC2A3   | solute carrier family 2 member 3                         |
| FLOT2    | flotillin 2                                              |
| RAP1GDS1 | Rap1 GTPase-GDP dissociation stimulator 1                |
| TGFBR3   | transforming growth factor beta receptor 3               |
| HILPDA   | hypoxia inducible lipid droplet associated               |
| SLC52A2  | solute carrier family 52 member 2                        |
| ZP2      | zona pellucida glycoprotein 2                            |
| PTGER3   | prostaglandin E receptor 3                               |
| IFNAR2   | interferon alpha and beta receptor subunit 2             |
| PRSS22   | serine protease 22                                       |
| MTNR1A   | melatonin receptor 1A                                    |
| NROB2    | nuclear receptor subfamily 0 group B member 2            |
| SOX9     | SRY-box transcription factor 9                           |
| EPB41L5  | erythrocyte membrane protein band 4.1 like 5             |
| ABCC5    | ATP binding cassette subfamily C member 5                |
| PHC2     | polyhomeotic homolog 2                                   |
| TACC2    | transforming acidic coiled-coil containing protein 2     |
| BTN2A2   | butyrophilin subfamily 2 member A2                       |
| PTPN1    | protein tyrosine phosphatase non-receptor type 1         |
| SQLE     | squalene epoxidase                                       |
| LBP      | lipopolysaccharide binding protein                       |
| RPH3AL   | rabphilin 3A like (without C2 domains)                   |
| S100A8   | S100 calcium binding protein A8                          |
| YAF2     | YY1 associated factor 2                                  |
| SCML1    | Scm polycomb group protein like 1                        |
| UAP1     | UDP-N-acetylglucosamine pyrophosphorylase 1              |
| ARG2     | arginase 2                                               |

## Bioinformatics analysis of membranous nephropathy

|          |                                                             |
|----------|-------------------------------------------------------------|
| LRP10    | LDL receptor related protein 10                             |
| SASH1    | SAM and SH3 domain containing 1                             |
| TNFAIP3  | TNF alpha induced protein 3                                 |
| GAS2L1   | growth arrest specific 2 like 1                             |
| TMED3    | transmembrane p24 trafficking protein 3                     |
| TNIP2    | TNFAIP3 interacting protein 2                               |
| KIF16B   | kinesin family member 16B                                   |
| SECTM1   | secreted and transmembrane 1                                |
| CYBC1    | cytochrome b-245 chaperone 1                                |
| DNM1L    | dynamamin 1 like                                            |
| NR1H4    | nuclear receptor subfamily 1 group H member 4               |
| KIF13B   | kinesin family member 13B                                   |
| FLOT1    | flotillin 1                                                 |
| NR1H2    | nuclear receptor subfamily 1 group H member 2               |
| SRSF4    | serine and arginine rich splicing factor 4                  |
| ADIPOR2  | adiponectin receptor 2                                      |
| VWA5A    | von Willebrand factor A domain containing 5A                |
| HNRNPDL  | heterogeneous nuclear ribonucleoprotein D like              |
| HECA     | hdc homolog, cell cycle regulator                           |
| CCNH     | cyclin H                                                    |
| IER3     | immediate early response 3                                  |
| GYG1     | glycogenin 1                                                |
| APCS     | amyloid P component, serum                                  |
| IDH3A    | isocitrate dehydrogenase (NAD(+)) 3 catalytic subunit alpha |
| SPSB1    | splA/ryanodine receptor domain and SOCS box containing 1    |
| AHI1     | Abelson helper integration site 1                           |
| FKBP5    | FKBP prolyl isomerase 5                                     |
| MAP3K14  | mitogen-activated protein kinase kinase kinase 14           |
| TOB1     | transducer of ERBB2, 1                                      |
| ARAP2    | ArfGAP with RhoGAP domain, ankyrin repeat and PH domain 2   |
| HMGR     | 3-hydroxy-3-methylglutaryl-CoA reductase                    |
| SHFL     | shiftless antiviral inhibitor of ribosomal frameshifting    |
| SLC66A2  | solute carrier family 66 member 2                           |
| SCAPER   | S-phase cyclin A associated protein in the ER               |
| BIRC3    | baculoviral IAP repeat containing 3                         |
| IVNS1ABP | influenza virus NS1A binding protein                        |
| PAX8     | paired box 8                                                |
| RAB20    | RAB20, member RAS oncogene family                           |
| ZNF184   | zinc finger protein 184                                     |
| TCP11L1  | t-complex 11 like 1                                         |
| FERMT2   | FERM domain containing kindlin 2                            |
| LTN1     | listerin E3 ubiquitin protein ligase 1                      |
| ZDHHC6   | zinc finger DHHC-type palmitoyltransferase 6                |
| EIF2AK3  | eukaryotic translation initiation factor 2 alpha kinase 3   |
| NPC1     | NPC intracellular cholesterol transporter 1                 |
| FNBP4    | formin binding protein 4                                    |
| MALT1    | MALT1 paracaspase                                           |
| ZBTB16   | zinc finger and BTB domain containing 16                    |
| IARS1    | isoleucyl-tRNA synthetase 1                                 |
| ZNF189   | zinc finger protein 189                                     |
| WARS1    | tryptophanyl-tRNA synthetase 1                              |
| MTCP1    | mature T cell proliferation 1                               |
| CDH6     | cadherin 6                                                  |

## Bioinformatics analysis of membranous nephropathy

|           |                                                            |
|-----------|------------------------------------------------------------|
| KLF8      | Kruppel like factor 8                                      |
| NFIL3     | nuclear factor, interleukin 3 regulated                    |
| UBE2L6    | ubiquitin conjugating enzyme E2 L6                         |
| TEAD4     | TEA domain transcription factor 4                          |
| PNMA2     | PNMA family member 2                                       |
| IMPDH1    | inosine monophosphate dehydrogenase 1                      |
| GOLGA3    | golgin A3                                                  |
| F3        | coagulation factor III, tissue factor                      |
| P4HA1     | prolyl 4-hydroxylase subunit alpha 1                       |
| IFI35     | interferon induced protein 35                              |
| TKT       | transketolase                                              |
| TACC1     | transforming acidic coiled-coil containing protein 1       |
| DBF4      | DBF4 zinc finger                                           |
| MCL1      | MCL1 apoptosis regulator, BCL2 family member               |
| SLCO4A1   | solute carrier organic anion transporter family member 4A1 |
| TSPYL2    | TSPY like 2                                                |
| CXCL2     | C-X-C motif chemokine ligand 2                             |
| WTAP      | WT1 associated protein                                     |
| CREM      | cAMP responsive element modulator                          |
| RCL1      | RNA terminal phosphate cyclase like 1                      |
| RARRES1   | retinoic acid receptor responder 1                         |
| TFRC      | transferrin receptor                                       |
| UBAP1     | ubiquitin associated protein 1                             |
| LEFTY1    | left-right determination factor 1                          |
| TSC22D2   | TSC22 domain family member 2                               |
| TRIM13    | tripartite motif containing 13                             |
| JUND      | JunD proto-oncogene, AP-1 transcription factor subunit     |
| IFRD1     | interferon related developmental regulator 1               |
| CARHSP1   | calcium regulated heat stable protein 1                    |
| GPR3      | G protein-coupled receptor 3                               |
| DUSP6     | dual specificity phosphatase 6                             |
| AASS      | aminoadipate-semialdehyde synthase                         |
| FAM131A   | family with sequence similarity 131 member A               |
| F12       | coagulation factor XII                                     |
| LRRFIP2   | LRR binding FLII interacting protein 2                     |
| CGA       | glycoprotein hormones, alpha polypeptide                   |
| DDX5      | DEAD-box helicase 5                                        |
| FOSB      | FosB proto-oncogene, AP-1 transcription factor subunit     |
| C1RL      | complement C1r subcomponent like                           |
| IGFLR1    | IGF like family receptor 1                                 |
| ABCA5     | ATP binding cassette subfamily A member 5                  |
| ISG20     | interferon stimulated exonuclease gene 20                  |
| GABARAPL1 | GABA type A receptor associated protein like 1             |
| IL1RL1    | interleukin 1 receptor like 1                              |
| REG1B     | regenerating family member 1 beta                          |
| CEMIP2    | cell migration inducing hyaluronidase 2                    |
| IL6R      | interleukin 6 receptor                                     |
| ZNF331    | zinc finger protein 331                                    |
| PDE4D     | phosphodiesterase 4D                                       |
| S100A9    | S100 calcium binding protein A9                            |
| KLF9      | Kruppel like factor 9                                      |
| DEPP1     | DEPP1 autophagy regulator                                  |
| HIVEP2    | HIVEP zinc finger 2                                        |

## Bioinformatics analysis of membranous nephropathy

|          |                                                                                                   |
|----------|---------------------------------------------------------------------------------------------------|
| SOD2     | superoxide dismutase 2                                                                            |
| JUN      | Jun proto-oncogene, AP-1 transcription factor subunit                                             |
| BTG2     | BTG anti-proliferation factor 2                                                                   |
| SLC38A2  | solute carrier family 38 member 2                                                                 |
| C1R      | complement C1r                                                                                    |
| VMP1     | vacuole membrane protein 1                                                                        |
| SMARCD3  | SWI/SNF related, matrix associated, actin dependent regulator of chromatin, subfamily d, member 3 |
| RBBP8    | RB binding protein 8, endonuclease                                                                |
| PPARGC1A | PPARG coactivator 1 alpha                                                                         |
| STAT1    | signal transducer and activator of transcription 1                                                |
| SLC39A14 | solute carrier family 39 member 14                                                                |
| RIOX1    | ribosomal oxygenase 1                                                                             |
| RHOB     | ras homolog family member B                                                                       |
| KLF6     | Kruppel like factor 6                                                                             |
| PPP2R3A  | protein phosphatase 2 regulatory subunit B <sup>alpha</sup>                                       |
| ETS2     | ETS proto-oncogene 2, transcription factor                                                        |
| HES1     | hes family bHLH transcription factor 1                                                            |
| SERPINA3 | serpin family A member 3                                                                          |
| CISH     | cytokine inducible SH2 containing protein                                                         |
| LIPG     | lipase G, endothelial type                                                                        |
| CHI3L1   | chitinase 3 like 1                                                                                |
| NR4A3    | nuclear receptor subfamily 4 group A member 3                                                     |
| SRSF5    | serine and arginine rich splicing factor 5                                                        |
| IFIT5    | interferon induced protein with tetratricopeptide repeats 5                                       |
| ATF3     | activating transcription factor 3                                                                 |
| JUNB     | JunB proto-oncogene, AP-1 transcription factor subunit                                            |
| GADD45A  | growth arrest and DNA damage inducible alpha                                                      |
| RGS2     | regulator of G protein signaling 2                                                                |
| TSC22D3  | TSC22 domain family member 3                                                                      |
| NR4A1    | nuclear receptor subfamily 4 group A member 1                                                     |
| SLC19A2  | solute carrier family 19 member 2                                                                 |
| TMEM100  | transmembrane protein 100                                                                         |
| PDK4     | pyruvate dehydrogenase kinase 4                                                                   |
| RGS3     | regulator of G protein signaling 3                                                                |
| SOCS2    | suppressor of cytokine signaling 2                                                                |
| LDLR     | low density lipoprotein receptor                                                                  |
| ELL2     | elongation factor for RNA polymerase II 2                                                         |
| CEBPD    | CCAAT enhancer binding protein delta                                                              |
| EFNA1    | ephrin A1                                                                                         |
| AKAP13   | A-kinase anchoring protein 13                                                                     |
| APOLD1   | apolipoprotein L domain containing 1                                                              |
| NEDD9    | neural precursor cell expressed, developmentally down-regulated 9                                 |
| GPX2     | glutathione peroxidase 2                                                                          |
| NFKBIA   | NFKB inhibitor alpha                                                                              |
| CCNL1    | cyclin L1                                                                                         |
| CEBPB    | CCAAT enhancer binding protein beta                                                               |
| PPP2R1B  | protein phosphatase 2 scaffold subunit Abeta                                                      |
| FOS      | Fos proto-oncogene, AP-1 transcription factor subunit                                             |
| EGR1     | early growth response 1                                                                           |
| RETREG1  | reticulophagy regulator 1                                                                         |
| ZFP36    | ZFP36 ring finger protein                                                                         |
| TUBGCP3  | tubulin gamma complex associated protein 3                                                        |

## Bioinformatics analysis of membranous nephropathy

|       |            |                                                             |
|-------|------------|-------------------------------------------------------------|
|       | SGK1       | serum/glucocorticoid regulated kinase 1                     |
|       | GADD45B    | growth arrest and DNA damage inducible beta                 |
|       | DUSP1      | dual specificity phosphatase 1                              |
|       | TIPARP     | TCDD inducible poly (ADP-ribose) polymerase                 |
|       | ZFAND5     | zinc finger AN1-type containing 5                           |
| PBMCs | GOLGA6L5P  | golgin A6 family like 5, pseudogene                         |
|       | ZDHHC22    | zinc finger DHHC-type palmitoyltransferase 22               |
|       | COTL1      | coactosin like F-actin binding protein 1                    |
|       | DICER1-AS1 | DICER1 antisense RNA 1                                      |
|       | ARL6IP1    | ADP ribosylation factor like GTPase 6 interacting protein 1 |
|       | HNRNPA1    | heterogeneous nuclear ribonucleoprotein A1                  |
|       | FZD5       | frizzled class receptor 5                                   |
|       | MAP4K4     | mitogen-activated protein kinase kinase kinase kinase 4     |
|       | GALE       | UDP-galactose-4-epimerase                                   |
|       | MXRA8      | matrix remodeling associated 8                              |
|       | PRKCB      | protein kinase C beta                                       |
|       | RNASE4     | ribonuclease A family member 4                              |
|       | MTDH       | metadherin                                                  |
|       | CECR5      | haloacid dehalogenase like hydrolase domain containing 5    |
|       | USP34      | ubiquitin specific peptidase 34                             |
|       | MTMR9      | myotubularin related protein 9                              |
|       | GNA12      | G protein subunit alpha 12                                  |
|       | MAEA       | macrophage erythroblast attacher, E3 ubiquitin ligase       |
|       | TNPO3      | transportin 3                                               |
|       | TEX11      | testis expressed 11                                         |
|       | XPOT       | exportin for tRNA                                           |
|       | METTL9     | methyltransferase like 9                                    |
|       | RYK        | receptor like tyrosine kinase                               |
|       | NFKB1      | nuclear factor kappa B subunit 1                            |
|       | DEPDC7     | DEP domain containing 7                                     |
|       | ZNF211     | zinc finger protein 211                                     |
|       | HMG5       | high mobility group nucleosome binding domain 5             |
|       | TMEM43     | transmembrane protein 43                                    |
|       | RRAGC      | Ras related GTP binding C                                   |
|       | FAM57A     | TLC domain containing 3A                                    |
|       | DOHH       | deoxyhypusine hydroxylase                                   |
|       | TMSB4Y     | thymosin beta 4 Y-linked                                    |
|       | ANKRD11    | ankyrin repeat domain 11                                    |
|       | FEM1A      | fem-1 homolog A                                             |
|       | ZNF230     | zinc finger protein 230                                     |
|       | QARS       | glutamyl-prolyl-tRNA synthetase 1                           |
|       | PPP6R2     | protein phosphatase 6 regulatory subunit 2                  |
|       | RABGGTB    | Rab geranylgeranyltransferase subunit beta                  |
|       | FAM221A    | family with sequence similarity 221 member A                |
|       | ANXA7      | annexin A7                                                  |
|       | RCSD1      | RCSD domain containing 1                                    |
|       | LARP7      | La ribonucleoprotein 7, transcriptional regulator           |
|       | ARV1       | ARV1 homolog, fatty acid homeostasis modulator              |
|       | RAP1GAP2   | RAP1 GTPase activating protein 2                            |
|       | CDK1       | cyclin dependent kinase 1                                   |
|       | HPS1       | HPS1 biogenesis of lysosomal organelles complex 3 subunit 1 |
|       | MAP3K4     | mitogen-activated protein kinase kinase kinase 4            |
|       | CLK3       | CDC like kinase 3                                           |

## Bioinformatics analysis of membranous nephropathy

|           |                                                                      |
|-----------|----------------------------------------------------------------------|
| USP31     | ubiquitin specific peptidase 31                                      |
| OPTN      | optineurin                                                           |
| PARG      | poly (ADP-ribose) glycohydrolase                                     |
| CBR3      | carbonyl reductase 3                                                 |
| NDRG3     | NDRG family member 3                                                 |
| FMN1      | formin 1                                                             |
| CASD1     | CAS1 domain containing 1                                             |
| INO80C    | INO80 complex subunit C                                              |
| PICALM    | phosphatidylinositol binding clathrin assembly protein               |
| SRP68     | signal recognition particle 68                                       |
| BTBD10    | BTB domain containing 10                                             |
| APC       | APC regulator of WNT signaling pathway                               |
| BTF3P11   | basic transcription factor 3 pseudogene 11                           |
| HBP1      | HMG-box transcription factor 1                                       |
| ITLN1     | intelectin 1                                                         |
| ABCC5     | ATP binding cassette subfamily C member 5                            |
| EFS       | embryonal Fyn-associated substrate                                   |
| MED22     | mediator complex subunit 22                                          |
| BACE2     | beta-secretase 2                                                     |
| MFAP1     | microfibril associated protein 1                                     |
| ST13      | ST13 Hsp70 interacting protein                                       |
| GOLGA5    | golgin A5                                                            |
| LONRF1    | LON peptidase N-terminal domain and ring finger 1                    |
| ESCO2     | establishment of sister chromatid cohesion N-acetyltransferase 2     |
| NGRN      | neugrin, neurite outgrowth associated                                |
| NEB       | nebulin                                                              |
| UBE2G1    | ubiquitin conjugating enzyme E2 G1                                   |
| TRIM64    | tripartite motif containing 64                                       |
| BCAR3     | BCAR3 adaptor protein, NSP family member                             |
| ADORA2A   | adenosine A2a receptor                                               |
| SERPIND1  | serpin family D member 1                                             |
| CCM2L     | CCM2 like scaffold protein                                           |
| ANAPC13   | anaphase promoting complex subunit 13                                |
| RPAP3     | RNA polymerase II associated protein 3                               |
| HNRNPA1L2 | heterogeneous nuclear ribonucleoprotein A1 like 2                    |
| GMCL1     | germ cell-less 1, spermatogenesis associated                         |
| WNK1      | WNK lysine deficient protein kinase 1                                |
| ATP2C1    | ATPase secretory pathway Ca <sup>2+</sup> transporting 1             |
| HHEX      | hematopoietically expressed homeobox                                 |
| CLEC4E    | C-type lectin domain family 4 member E                               |
| PPID      | peptidylprolyl isomerase D                                           |
| MRFAP1L1  | Morf4 family associated protein 1 like 1                             |
| SNIP1     | Smad nuclear interacting protein 1                                   |
| CDH1      | cadherin 1                                                           |
| PPM1A     | protein phosphatase, Mg <sup>2+</sup> /Mn <sup>2+</sup> dependent 1A |
| DYX1C1    | dynein axonemal assembly factor 4                                    |
| TDRKH     | tudor and KH domain containing                                       |
| DNAJA4    | DnaJ heat shock protein family (Hsp40) member A4                     |
| THAP11    | THAP domain containing 11                                            |
| ITGAD     | integrin subunit alpha D                                             |
| LAMP2     | lysosomal associated membrane protein 2                              |
| NSUN3     | NOP2/Sun RNA methyltransferase 3                                     |
| TMEM204   | transmembrane protein 204                                            |

## Bioinformatics analysis of membranous nephropathy

|               |                                                                               |
|---------------|-------------------------------------------------------------------------------|
| PHF10         | PHD finger protein 10                                                         |
| SOX4          | SRY-box transcription factor 4                                                |
| POC5          | POC5 centriolar protein                                                       |
| BRX1          | biogenesis of ribosomes BRX1                                                  |
| HNRNPH2       | heterogeneous nuclear ribonucleoprotein H2                                    |
| MKRN1         | makorin ring finger protein 1                                                 |
| KCTD18        | potassium channel tetramerization domain containing 18                        |
| RNF146        | ring finger protein 146                                                       |
| TDRD12        | tudor domain containing 12                                                    |
| INPP5F        | inositol polyphosphate-5-phosphatase F                                        |
| MRM2          | mitochondrial rRNA methyltransferase 2                                        |
| UBE2M         | ubiquitin conjugating enzyme E2 M                                             |
| IRS2          | insulin receptor substrate 2                                                  |
| CDHR3         | cadherin related family member 3                                              |
| PCOLCE2       | procollagen C-endopeptidase enhancer 2                                        |
| PDCL3         | phosducin like 3                                                              |
| ATP1A4        | ATPase Na <sup>+</sup> /K <sup>+</sup> transporting subunit alpha 4           |
| METTL3        | methyltransferase 3, N6-adenosine-methyltransferase complex catalytic subunit |
| ALDH18A1      | aldehyde dehydrogenase 18 family member A1                                    |
| VMP1          | vacuole membrane protein 1                                                    |
| COQ8A         | coenzyme Q8A                                                                  |
| AJUBA         | ajuba LIM protein                                                             |
| KISS1R        | KISS1 receptor                                                                |
| KDM3A         | lysine demethylase 3A                                                         |
| TPRG1L        | tumor protein p63 regulated 1 like                                            |
| CHRD          | chordin                                                                       |
| C1orf229      | long intergenic non-protein coding RNA 2897                                   |
| TEPP          | testis, prostate and placenta expressed                                       |
| CSNK1A1       | casein kinase 1 alpha 1                                                       |
| MTERF3        | mitochondrial transcription termination factor 3                              |
| FEN1          | flap structure-specific endonuclease 1                                        |
| DKFZP586I1420 | uncharacterized protein DKFZp586I1420                                         |
| NFKBIZ        | NFKB inhibitor zeta                                                           |
| FAM69A        | divergent protein kinase domain 1A                                            |
| MTMR12        | myotubularin related protein 12                                               |
| ERP44         | endoplasmic reticulum protein 44                                              |
| HNRNPH3       | heterogeneous nuclear ribonucleoprotein H3                                    |
| CTSE          | cathepsin E                                                                   |
| SMCHD1        | structural maintenance of chromosomes flexible hinge domain containing 1      |
| NEUROG1       | neurogenin 1                                                                  |
| PLPP3         | phospholipid phosphatase 3                                                    |
| FAM71E1       | family with sequence similarity 71 member E1                                  |
| CUL3          | cullin 3                                                                      |
| TRIP12        | thyroid hormone receptor interactor 12                                        |
| INTS5         | integrator complex subunit 5                                                  |
| CTNNAL1       | catenin alpha like 1                                                          |
| CCDC34        | coiled-coil domain containing 34                                              |
| PCMT1         | protein-L-isoaspartate (D-aspartate) O-methyltransferase                      |
| RAB27A        | RAB27A, member RAS oncogene family                                            |
| PLIN3         | perilipin 3                                                                   |
| ZNF487        | zinc finger protein 487                                                       |
| PJA1          | praja ring finger ubiquitin ligase 1                                          |
| DYNC2H1       | dynein cytoplasmic 2 heavy chain 1                                            |



## Bioinformatics analysis of membranous nephropathy

|              |                                                               |
|--------------|---------------------------------------------------------------|
| UNC50        | unc-50 inner nuclear membrane RNA binding protein             |
| VSTM2A       | V-set and transmembrane domain containing 2A                  |
| SLC2A3       | solute carrier family 2 member 3                              |
| PAGE5        | PAGE family member 5                                          |
| ATCAY        | ATCAY kinesin light chain interacting caytaxin                |
| EGFEM1P      | EGF like and EMI domain containing 1, pseudogene              |
| IFRD1        | interferon related developmental regulator 1                  |
| CCDC82       | coiled-coil domain containing 82                              |
| TBC1D14      | TBC1 domain family member 14                                  |
| PSMC6        | proteasome 26S subunit, ATPase 6                              |
| ELF1         | E74 like ETS transcription factor 1                           |
| CAND1        | cullin associated and neddylation dissociated 1               |
| HGF          | hepatocyte growth factor                                      |
| ATP10D       | ATPase phospholipid transporting 10D (putative)               |
| KRAS         | KRAS proto-oncogene, GTPase                                   |
| EDEM1        | ER degradation enhancing alpha-mannosidase like protein 1     |
| PRRC1        | proline rich coiled-coil 1                                    |
| HMCES        | 5-hydroxymethylcytosine binding, ES cell specific             |
| AFG3L2       | AFG3 like matrix AAA peptidase subunit 2                      |
| CLK1         | CDC like kinase 1                                             |
| DNAJB6       | DnaJ heat shock protein family (Hsp40) member B6              |
| SNX17        | sorting nexin 17                                              |
| RABEP1       | rabaptin, RAB GTPase binding effector protein 1               |
| API5         | apoptosis inhibitor 5                                         |
| ZNF285       | zinc finger protein 285                                       |
| GTF2B        | general transcription factor IIB                              |
| MORF4L1      | mortality factor 4 like 1                                     |
| TM2D3        | TM2 domain containing 3                                       |
| GIT2         | GIT ArfGAP 2                                                  |
| PRKAR1A      | protein kinase cAMP-dependent type I regulatory subunit alpha |
| RAB28        | RAB28, member RAS oncogene family                             |
| KCTD15       | potassium channel tetramerization domain containing 15        |
| MRFAP1       | Morf4 family associated protein 1                             |
| STEAP3       | STEAP3 metalloreductase                                       |
| CNPY4        | canopy FGF signaling regulator 4                              |
| VTA1         | vesicle trafficking 1                                         |
| TARDBP       | TAR DNA binding protein                                       |
| ATAD3C       | ATPase family AAA domain containing 3C                        |
| LPCAT1       | lysophosphatidylcholine acyltransferase 1                     |
| CCDC126      | coiled-coil domain containing 126                             |
| FAM118A      | family with sequence similarity 118 member A                  |
| CAMTA1       | calmodulin binding transcription activator 1                  |
| TFCP2        | transcription factor CP2                                      |
| BORCS8-MEF2B | BORCS8-MEF2B readthrough                                      |
| RNF114       | ring finger protein 114                                       |
| NEK7         | NIMA related kinase 7                                         |
| PPP2CA       | protein phosphatase 2 catalytic subunit alpha                 |
| RAD51AP1     | RAD51 associated protein 1                                    |
| APMAP        | adipocyte plasma membrane associated protein                  |
| SURF6        | surfeit 6                                                     |
| ANP32A       | acidic nuclear phosphoprotein 32 family member A              |
| CFDP1        | craniofacial development protein 1                            |
| EMC2         | ER membrane protein complex subunit 2                         |

## Bioinformatics analysis of membranous nephropathy

|           |                                                              |
|-----------|--------------------------------------------------------------|
| BRMS1L    | BRMS1 like transcriptional repressor                         |
| RBM7      | RNA binding motif protein 7                                  |
| DNAJA1    | DnaJ heat shock protein family (Hsp40) member A1             |
| GFM2      | GTP dependent ribosome recycling factor mitochondrial 2      |
| RNPEP     | arginyl aminopeptidase                                       |
| GNB1      | G protein subunit beta 1                                     |
| ADH5      | alcohol dehydrogenase 5 (class III), chi polypeptide         |
| PDIA6     | protein disulfide isomerase family A member 6                |
| PPP3CA    | protein phosphatase 3 catalytic subunit alpha                |
| STIP1     | stress induced phosphoprotein 1                              |
| SESN1     | sestrin 1                                                    |
| NME7      | NME/NM23 family member 7                                     |
| TNXB      | tenascin XB                                                  |
| AP2A2     | adaptor related protein complex 2 subunit alpha 2            |
| ELMO2     | engulfment and cell motility 2                               |
| UTP6      | UTP6 small subunit processome component                      |
| RUBCN     | rubicon autophagy regulator                                  |
| ARHGEF37  | Rho guanine nucleotide exchange factor 37                    |
| TMEM9B    | TMEM9 domain family member B                                 |
| MYCBP     | MYC binding protein                                          |
| RPL7      | ribosomal protein L7                                         |
| IGF2R     | insulin like growth factor 2 receptor                        |
| ADNP      | activity dependent neuroprotector homeobox                   |
| C1orf116  | chromosome 1 open reading frame 116                          |
| RAB9BP1   | RAB9B, member RAS oncogene family pseudogene 1               |
| TCERG1    | transcription elongation regulator 1                         |
| FBXO3     | F-box protein 3                                              |
| PSEN1     | presenilin 1                                                 |
| ADD2      | adducin 2                                                    |
| KIAA0232  | KIAA0232                                                     |
| ZNF681    | zinc finger protein 681                                      |
| RNF20     | ring finger protein 20                                       |
| PER3      | period circadian regulator 3                                 |
| SAT1      | spermidine/spermine N1-acetyltransferase 1                   |
| RILP      | Rab interacting lysosomal protein                            |
| FOXJ2     | forkhead box J2                                              |
| SLC1A1    | solute carrier family 1 member 1                             |
| RCC1L     | RCC1 like                                                    |
| FAM135A   | family with sequence similarity 135 member A                 |
| E2F3      | E2F transcription factor 3                                   |
| CDK8      | cyclin dependent kinase 8                                    |
| BLOC1S6   | biogenesis of lysosomal organelles complex 1 subunit 6       |
| ZNF263    | zinc finger protein 263                                      |
| FAM120C   | family with sequence similarity 120C                         |
| BEX4      | brain expressed X-linked 4                                   |
| TMC01     | transmembrane and coiled-coil domains 1                      |
| PAGE2     | PAGE family member 2                                         |
| HERC2     | HECT and RLD domain containing E3 ubiquitin protein ligase 2 |
| HAT1      | histone acetyltransferase 1                                  |
| LINC01123 | long intergenic non-protein coding RNA 1123                  |
| ACAT1     | acetyl-CoA acetyltransferase 1                               |
| SCP2      | sterol carrier protein 2                                     |
| RWDD4     | RWD domain containing 4                                      |

## Bioinformatics analysis of membranous nephropathy

|              |                                                                              |
|--------------|------------------------------------------------------------------------------|
| CD59         | CD59 molecule (CD59 blood group)                                             |
| LHX1         | LIM homeobox 1                                                               |
| PAIP2        | poly(A) binding protein interacting protein 2                                |
| TECPR2       | tectonin beta-propeller repeat containing 2                                  |
| DNAJA2       | DnaJ heat shock protein family (Hsp40) member A2                             |
| KDELC1       | protein O-glycosyltransferase 2                                              |
| PCID2        | PCI domain containing 2                                                      |
| DAPK1        | death associated protein kinase 1                                            |
| ZNF827       | zinc finger protein 827                                                      |
| ALDH5A1      | aldehyde dehydrogenase 5 family member A1                                    |
| TSNAX        | translin associated factor X                                                 |
| C9orf78      | chromosome 9 open reading frame 78                                           |
| ASAH1        | N-acylsphingosine amidohydrolase 1                                           |
| BMX          | BMX non-receptor tyrosine kinase                                             |
| PRTN3        | proteinase 3                                                                 |
| NPBWR1       | neuropeptides B and W receptor 1                                             |
| IDH3A        | isocitrate dehydrogenase (NAD(+)) 3 catalytic subunit alpha                  |
| CRK          | CRK proto-oncogene, adaptor protein                                          |
| KCNE2        | potassium voltage-gated channel subfamily E regulatory subunit 2             |
| NAP1L4       | nucleosome assembly protein 1 like 4                                         |
| ZNF282       | zinc finger protein 282                                                      |
| GPR20        | G protein-coupled receptor 20                                                |
| PAN3         | poly(A) specific ribonuclease subunit PAN3                                   |
| TMEM245      | transmembrane protein 245                                                    |
| TIFA         | TRAF interacting protein with forkhead associated domain                     |
| SPON1        | spondin 1                                                                    |
| SHQ1         | SHQ1, H/ACA ribonucleoprotein assembly factor                                |
| TMC5         | transmembrane channel like 5                                                 |
| PAPPA2       | pappalysin 2                                                                 |
| GALNT5       | polypeptide N-acetylgalactosaminyltransferase 5                              |
| FRMD4A       | FERM domain containing 4A                                                    |
| SLTM         | SAFB like transcription modulator                                            |
| RPL22        | ribosomal protein L22                                                        |
| ATP6V1E1     | ATPase H <sup>+</sup> transporting V1 subunit E1                             |
| ETS1         | ETS proto-oncogene 1, transcription factor                                   |
| LOC100422526 | proteasome activator subunit 3 pseudogene                                    |
| BRD7P3       | bromodomain containing 7 pseudogene 3                                        |
| JMJD1C       | jumonji domain containing 1C                                                 |
| KRTAP4-1     | keratin associated protein 4-1                                               |
| EIF4E        | eukaryotic translation initiation factor 4E                                  |
| ZMAT4        | zinc finger matrin-type 4                                                    |
| FAM168B      | family with sequence similarity 168 member B                                 |
| SEC23B       | SEC23 homolog B, COPII coat complex component                                |
| CAPZA2       | capping actin protein of muscle Z-line subunit alpha 2                       |
| HSP90AA1     | heat shock protein 90 alpha family class A member 1                          |
| HSD3B1       | hydroxy-delta-5-steroid dehydrogenase, 3 beta- and steroid delta-isomerase 1 |
| CLP1         | cleavage factor polyribonucleotide kinase subunit 1                          |
| SOX17        | SRY-box transcription factor 17                                              |
| XRN2         | 5'-3' exoribonuclease 2                                                      |
| RIPK4        | receptor interacting serine/threonine kinase 4                               |
| CORIN        | corin, serine peptidase                                                      |
| CUTC         | cutC copper transporter                                                      |
| CEACAM6      | CEA cell adhesion molecule 6                                                 |

## Bioinformatics analysis of membranous nephropathy

|              |                                                             |
|--------------|-------------------------------------------------------------|
| ATPAF1       | ATP synthase mitochondrial F1 complex assembly factor 1     |
| HRASLS2      | phospholipase A and acyltransferase 2                       |
| RFX4         | regulatory factor X4                                        |
| FCER1A       | Fc fragment of IgE receptor 1a                              |
| MAFG-AS1     | MAFG divergent transcript                                   |
| HMGCS1       | 3-hydroxy-3-methylglutaryl-CoA synthase 1                   |
| CAND2        | cullin associated and neddylation dissociated 2 (putative)  |
| PSEN2        | presenilin 2                                                |
| ANXA3        | annexin A3                                                  |
| UBFD1        | ubiquitin family domain containing 1                        |
| SUPT16H      | SPT16 homolog, facilitates chromatin remodeling subunit     |
| EFNA1        | ephrin A1                                                   |
| FA2H         | fatty acid 2-hydroxylase                                    |
| SYF2         | SYF2 pre-mRNA splicing factor                               |
| CCDC115      | coiled-coil domain containing 115                           |
| WBP4         | WW domain binding protein 4                                 |
| RAD17        | RAD17 checkpoint clamp loader component                     |
| MRGPRF       | MAS related GPR family member F                             |
| MSANTD2      | Myb/SANT DNA binding domain containing 2                    |
| PAQR9        | progesterone and adipoQ receptor family member 9            |
| TMEM232      | transmembrane protein 232                                   |
| GCH1         | GTP cyclohydrolase 1                                        |
| NUPL2        | nucleoporin 42                                              |
| TTC33        | tetratricopeptide repeat domain 33                          |
| TPMT         | thiopurine S-methyltransferase                              |
| MINOS1P1     | MICOS10 pseudogene 1                                        |
| HEPACAM2     | HEPACAM family member 2                                     |
| RBMX2        | RNA binding motif protein X-linked 2                        |
| SNAP23       | synaptosome associated protein 23                           |
| ATRNL1       | attractin like 1                                            |
| PSMD10       | proteasome 26S subunit, non-ATPase 10                       |
| SPTA1        | spectrin alpha, erythrocytic 1                              |
| LOC101928068 | uncharacterized LOC101928068                                |
| B4GALNT3     | beta-1,4-N-acetyl-galactosaminyltransferase 3               |
| ZNF12        | zinc finger protein 12                                      |
| CACUL1       | CDK2 associated cullin domain 1                             |
| SDHC         | succinate dehydrogenase complex subunit C                   |
| TMEM167B     | transmembrane protein 167B                                  |
| HCFC1        | host cell factor C1                                         |
| IQCC         | IQ motif containing C                                       |
| FOXJ1        | forkhead box J1                                             |
| CYB5B        | cytochrome b5 type B                                        |
| ARL13B       | ADP ribosylation factor like GTPase 13B                     |
| KRT1         | keratin 1                                                   |
| DKK3         | dickkopf WNT signaling pathway inhibitor 3                  |
| AXIN2        | axin 2                                                      |
| MAF          | MAF bZIP transcription factor                               |
| SARAF        | store-operated calcium entry associated regulatory factor   |
| DYNC2LI1     | dynein cytoplasmic 2 light intermediate chain 1             |
| FOXB1        | forkhead box B1                                             |
| EIF2S1       | eukaryotic translation initiation factor 2 subunit alpha    |
| LAMTOR3      | late endosomal/lysosomal adaptor, MAPK and MTOR activator 3 |
| UBE2Q2       | ubiquitin conjugating enzyme E2 Q2                          |

## Bioinformatics analysis of membranous nephropathy

|           |                                                                     |
|-----------|---------------------------------------------------------------------|
| MTM1      | myotubularin 1                                                      |
| RAB1A     | RAB1A, member RAS oncogene family                                   |
| ADAR      | adenosine deaminase RNA specific                                    |
| SLC35B3   | solute carrier family 35 member B3                                  |
| GFPT2     | glutamine-fructose-6-phosphate transaminase 2                       |
| GLDC      | glycine decarboxylase                                               |
| KARS      | lysyl-tRNA synthetase 1                                             |
| HSPB9     | heat shock protein family B (small) member 9                        |
| CD1D      | CD1d molecule                                                       |
| ASPHD1    | aspartate beta-hydroxylase domain containing 1                      |
| LRP3      | LDL receptor related protein 3                                      |
| FAM173B   | ATP synthase c subunit lysine N-methyltransferase                   |
| TGFA      | transforming growth factor alpha                                    |
| KLF5      | Kruppel like factor 5                                               |
| GPR31     | G protein-coupled receptor 31                                       |
| WDTC1     | WD and tetratricopeptide repeats 1                                  |
| MSTN      | myostatin                                                           |
| BTNL3     | butyrophilin like 3                                                 |
| CLPSL2    | colipase like 2                                                     |
| NLGN4Y    | neuroligin 4 Y-linked                                               |
| IFI27     | interferon alpha inducible protein 27                               |
| LHB       | luteinizing hormone subunit beta                                    |
| ACER1     | alkaline ceramidase 1                                               |
| ENC1      | ectodermal-neural cortex 1                                          |
| PLCXD2    | phosphatidylinositol specific phospholipase C X domain containing 2 |
| TAPBP     | TAP binding protein                                                 |
| LINC00476 | long intergenic non-protein coding RNA 476                          |

**Supplementary Table 2.** Detailed results of DEGs functional enrichment

| Names         | total | elements                                                                                                                                                                                                                                                                                                                                                                                                                                                                                                                                                                                                                                                                                                                                              |
|---------------|-------|-------------------------------------------------------------------------------------------------------------------------------------------------------------------------------------------------------------------------------------------------------------------------------------------------------------------------------------------------------------------------------------------------------------------------------------------------------------------------------------------------------------------------------------------------------------------------------------------------------------------------------------------------------------------------------------------------------------------------------------------------------|
| Glom PBMC Tub | 48    | positive regulation of transferase activity<br>negative regulation of cellular component organization<br>actin filament-based process<br>Endometrial cancer<br>hemostasis<br>regeneration<br>glial cell differentiation<br>regulation of cell adhesion<br>negative regulation of protein modification process<br>MAPK signaling pathway<br>liver development<br>Pathways in cancer<br>regulation of kinase activity<br>regulation of body fluid levels<br>regulation of protein serine/threonine kinase activity<br>regulation of protein kinase activity<br>positive regulation of kinase activity<br>Pancreatic cancer<br>response to inorganic substance<br>blood vessel morphogenesis<br>actin cytoskeleton organization<br>lymphocyte activation |

## Bioinformatics analysis of membranous nephropathy

|          |     |                                                                          |
|----------|-----|--------------------------------------------------------------------------|
|          |     | blood coagulation                                                        |
|          |     | response to wounding                                                     |
|          |     | negative regulation of catalytic activity                                |
|          |     | negative regulation of catabolic process                                 |
|          |     | regulation of neuron death                                               |
|          |     | cellular response to nitrogen compound                                   |
|          |     | Melanoma                                                                 |
|          |     | pattern specification process                                            |
|          |     | Corticotropin-releasing hormone signaling pathway                        |
|          |     | blood vessel development                                                 |
|          |     | VEGFA-VEGFR2 signaling pathway                                           |
|          |     | positive regulation of protein phosphorylation                           |
|          |     | hepaticobiliary system development                                       |
|          |     | positive regulation of protein kinase activity                           |
|          |     | cellular component disassembly                                           |
|          |     | viral process                                                            |
|          |     | cellular response to peptide                                             |
|          |     | wound healing                                                            |
|          |     | coagulation                                                              |
|          |     | Neural crest differentiation                                             |
|          |     | Non-small cell lung cancer                                               |
|          |     | Pancreatic adenocarcinoma pathway                                        |
|          |     | regulation of cell-cell adhesion                                         |
|          |     | gland development                                                        |
|          |     | Glioma                                                                   |
|          |     | cellular response to organonitrogen compound                             |
| Glom Tub | 272 | positive regulation of cell activation                                   |
|          |     | regulation of viral process                                              |
|          |     | regulation of epithelial cell differentiation                            |
|          |     | muscle organ development                                                 |
|          |     | regulation of angiogenesis                                               |
|          |     | muscle cell differentiation                                              |
|          |     | cellular response to environmental stimulus                              |
|          |     | regulation of steroid biosynthetic process                               |
|          |     | DNA damage response                                                      |
|          |     | connective tissue development                                            |
|          |     | nephron epithelium development                                           |
|          |     | cellular response to peptide hormone stimulus                            |
|          |     | response to oxidative stress                                             |
|          |     | regulation of transforming growth factor beta receptor signaling pathway |
|          |     | leukocyte cell-cell adhesion                                             |
|          |     | vasculogenesis                                                           |
|          |     | negative regulation of response to external stimulus                     |
|          |     | regulation of cellular ketone metabolic process                          |
|          |     | mononuclear cell differentiation                                         |
|          |     | epithelial tube morphogenesis                                            |
|          |     | cytokine-mediated signaling pathway                                      |
|          |     | Spinal cord injury                                                       |
|          |     | kidney development                                                       |
|          |     | regulation of cytokine production                                        |
|          |     | mesenchymal cell differentiation                                         |
|          |     | nephron tubule development                                               |

## Bioinformatics analysis of membranous nephropathy

positive regulation of cell death  
positive regulation of angiogenesis  
hormone biosynthetic process  
Notch signaling pathway  
pyruvate metabolic process  
T-cell activation SARS-CoV-2  
Gastrin signaling pathway  
endothelial cell migration  
regulation of tissue remodeling  
Chagas disease (American trypanosomiasis)  
taxis  
regulation of epithelial cell proliferation  
animal organ regeneration  
regulation of apoptotic signaling pathway  
T-cell receptor (TCR) signaling pathway  
negative regulation of cell differentiation  
Folate metabolism  
regulation of steroid metabolic process  
positive regulation of pri-miRNA transcription by RNA polymerase II  
Transcriptional Regulation by VENTX  
response to BMP  
regulation of epithelial cell migration  
cellular ketone metabolic process  
Signaling by Interleukins  
Measles  
fat cell differentiation  
response to steroid hormone  
glucose metabolic process  
adenylate cyclase-modulating G protein-coupled receptor signaling pathway  
in utero embryonic development  
regulation of defense response  
tissue morphogenesis  
multi-multicellular organism process  
cellular response to growth factor stimulus  
Epstein-Barr virus infection  
MAPK cascade  
regulation of inflammatory response  
regulation of endothelial cell migration  
muscle structure development  
regulation of neuron apoptotic process  
cellular response to insulin stimulus  
skeletal muscle organ development  
tissue migration  
osteoblast differentiation  
regulation of cellular response to growth factor stimulus  
AGE-RAGE signaling pathway in diabetic complications  
cellular response to molecule of bacterial origin  
Integrated breast cancer pathway  
positive regulation of cell-cell adhesion  
cell growth  
Cell cycle  
mesenchyme development  
insulin receptor signaling pathway

## Bioinformatics analysis of membranous nephropathy

autophagy of mitochondrion  
response to estradiol  
p53 signaling pathway  
response to ketone  
mitochondrion disassembly  
positive regulation of programmed cell death  
Cytokine Signaling in Immune system  
regulation of chemotaxis  
skeletal system development  
cell migration involved in sprouting angiogenesis  
axon development  
response to decreased oxygen levels  
Colorectal cancer  
renal system process  
Senescence and autophagy in cancer  
HTLV-I infection  
regulation of cell activation  
negative regulation of proteolysis  
Breast cancer  
female pregnancy  
positive regulation of cellular component movement  
cellular response to abiotic stimulus  
renal tubule development  
response to lipopolysaccharide  
embryonic organ development  
Interleukin-4 and Interleukin-13 signaling  
lymphocyte proliferation  
positive regulation of apoptotic process  
epithelial cell migration  
positive regulation of cellular component biogenesis  
Chromosomal and microsatellite instability in colorectal cancer  
neuron death  
urogenital system development  
renal system development  
protein kinase B signaling  
Chronic myeloid leukemia  
purine ribonucleotide metabolic process  
response to growth factor  
negative regulation of cellular component movement  
response to reactive oxygen species  
cellular response to lipopolysaccharide  
embryonic morphogenesis  
regulation of vasculature development  
leukocyte differentiation  
skeletal muscle tissue development  
RHOA GTPase cycle  
rhythmic process  
Metabolism of carbohydrates  
reactive oxygen species metabolic process  
T cell proliferation  
response to mechanical stimulus  
tissue remodeling  
hexose metabolic process



## Bioinformatics analysis of membranous nephropathy

response to vitamin  
response to nutrient levels  
transmembrane receptor protein serine/threonine kinase signaling pathway  
embryo development ending in birth or egg hatching  
Leishmania infection  
negative regulation of endothelial cell migration  
regulation of lipid metabolic process  
PI3K-Akt signaling pathway  
negative regulation of small molecule metabolic process  
embryonic epithelial tube formation  
Hepatitis C and hepatocellular carcinoma  
negative regulation of cell motility  
positive regulation of leukocyte activation  
response to transforming growth factor beta  
Vitamin D receptor pathway  
positive regulation of apoptotic signaling pathway  
hormone metabolic process  
Prolactin signaling pathway  
neuron apoptotic process  
reproductive structure development  
G1 to S cell cycle control  
monosaccharide metabolic process  
regulation of hormone biosynthetic process  
organelle disassembly  
secretion by cell  
positive regulation of vasculature development  
Diseases of metabolism  
ameboidal-type cell migration  
second-messenger-mediated signaling  
regulation of hormone metabolic process  
PID AP1 PATHWAY  
carbohydrate biosynthetic process  
response to nutrient  
response to glucocorticoid  
endocytosis  
endocrine system development  
response to molecule of bacterial origin  
epithelial cell proliferation  
cellular response to lipid  
RHOC GTPase cycle  
cellular response to hormone stimulus  
Hair follicle development: cytodifferentiation-part 3 of 3  
DNA damage response (only ATM dependent)  
IL-18 signaling pathway  
regulation of endocytosis  
Thyroid cancer  
regulation of transmembrane receptor protein serine/threonine kinase signaling pathway  
transmembrane receptor protein tyrosine kinase signaling pathway  
response to oxygen levels  
viral life cycle  
transforming growth factor beta receptor signaling pathway  
positive regulation of locomotion  
response to alcohol

## Bioinformatics analysis of membranous nephropathy

ossification  
regulation of DNA-templated transcription in response to stress  
regulation of reactive oxygen species metabolic process  
response to extracellular stimulus  
leukocyte proliferation  
positive regulation of reactive oxygen species metabolic process  
Hepatitis C  
cellular response to chemical stress  
response to corticosteroid  
T cell activation  
Adipogenesis  
Breast cancer pathway  
tube formation  
Herpes simplex infection  
negative regulation of cell migration  
cellular response to reactive oxygen species  
Hemostasis  
cellular response to ionizing radiation  
Endocrine resistance  
cellular response to transforming growth factor beta stimulus  
RHOB GTPase cycle  
negative regulation of cell cycle  
pri-miRNA transcription by RNA polymerase II  
Signaling by NOTCH  
kidney morphogenesis  
reproductive system development  
regulation of lipid biosynthetic process  
positive regulation of cell motility  
carbohydrate metabolic process  
regulation of pri-miRNA transcription by RNA polymerase II  
regulation of growth  
sprouting angiogenesis  
positive regulation of endocytosis  
epithelium migration  
GPCR downstream signalling  
regulation of viral life cycle  
negative regulation of cell population proliferation  
cellular response to biotic stimulus  
cellular response to hydrogen peroxide  
negative regulation of apoptotic signaling pathway  
response to peptide hormone  
negative regulation of cell-cell adhesion  
Viral carcinogenesis  
response to ionizing radiation  
chordate embryonic development  
Tuberculosis  
regulation of glucose metabolic process  
Platelet activation, signaling and aggregation  
morphogenesis of an epithelium  
PID REG GR PATHWAY  
heart morphogenesis  
chemotaxis  
regulation of leukocyte cell-cell adhesion

## Bioinformatics analysis of membranous nephropathy

|           |    |                                                                                 |
|-----------|----|---------------------------------------------------------------------------------|
|           |    | response to bacterium                                                           |
|           |    | cellular response to BMP stimulus                                               |
|           |    | positive regulation of cytokine production                                      |
|           |    | response to radiation                                                           |
|           |    | small molecule biosynthetic process                                             |
|           |    | positive regulation of cell migration                                           |
|           |    | regulation of small molecule metabolic process                                  |
|           |    | response to insulin                                                             |
|           |    | angiogenesis                                                                    |
|           |    | response to hypoxia                                                             |
|           |    | apoptotic signaling pathway                                                     |
|           |    | blood vessel endothelial cell migration                                         |
|           |    | smooth muscle cell differentiation                                              |
|           |    | Overlap between signal transduction pathways contributing to LMNA laminopathies |
|           |    | Small cell lung cancer                                                          |
|           |    | regulation of carbohydrate metabolic process                                    |
|           |    | cellular response to external stimulus                                          |
|           |    | aging                                                                           |
|           |    | mononuclear cell proliferation                                                  |
|           |    | Transcriptional regulation by RUNX2                                             |
|           |    | negative regulation of cell adhesion                                            |
|           |    | TGF-beta signaling pathway                                                      |
|           |    | nephron development                                                             |
|           |    | response to hydrogen peroxide                                                   |
|           |    | regulation of cellular response to transforming growth factor beta stimulus     |
|           |    | heart development                                                               |
|           |    | regulation of cell growth                                                       |
|           |    | epithelial cell differentiation                                                 |
|           |    | response to peptide                                                             |
|           |    | gastrulation                                                                    |
|           |    | positive regulation of cell adhesion                                            |
|           |    | developmental growth                                                            |
|           |    | cellular response to oxidative stress                                           |
|           |    | regulation of leukocyte activation                                              |
| Glom PBMC | 25 | cell junction organization                                                      |
|           |    | cell-cell signaling by wnt                                                      |
|           |    | regulation of canonical Wnt signaling pathway                                   |
|           |    | canonical Wnt signaling pathway                                                 |
|           |    | cell morphogenesis involved in differentiation                                  |
|           |    | determination of left/right symmetry                                            |
|           |    | regulation of MAP kinase activity                                               |
|           |    | membrane protein proteolysis                                                    |
|           |    | regulation of Wnt signaling pathway                                             |
|           |    | positive regulation of canonical Wnt signaling pathway                          |
|           |    | Wnt signaling pathway                                                           |
|           |    | positive regulation of MAP kinase activity                                      |
|           |    | positive regulation of Wnt signaling pathway                                    |
|           |    | Sphingolipid signaling pathway                                                  |
|           |    | positive regulation of protein binding                                          |
|           |    | regulation of cellular component size                                           |
|           |    | forebrain development                                                           |
|           |    | cell surface receptor signaling pathway involved in cell-cell signaling         |
|           |    | positive regulation of binding                                                  |

## Bioinformatics analysis of membranous nephropathy

|          |    |                                                                 |
|----------|----|-----------------------------------------------------------------|
|          |    | Prostate cancer                                                 |
|          |    | Wnt signaling                                                   |
|          |    | regulation of binding                                           |
|          |    | Head and neck squamous cell carcinoma                           |
|          |    | positive regulation of protein serine/threonine kinase activity |
|          |    | regulation of anatomical structure size                         |
| PBMC Tub | 81 | head development                                                |
|          |    | inclusion body assembly                                         |
|          |    | anterior/posterior pattern specification                        |
|          |    | Cellular responses to stimuli                                   |
|          |    | amyloid-beta metabolic process                                  |
|          |    | regulation of lipid localization                                |
|          |    | Neutrophil degranulation                                        |
|          |    | Metabolism of lipids                                            |
|          |    | Autophagy-animal                                                |
|          |    | Butanoate metabolism                                            |
|          |    | Nuclear receptors meta-pathway                                  |
|          |    | response to temperature stimulus                                |
|          |    | lipid catabolic process                                         |
|          |    | positive regulation of protein transport                        |
|          |    | Hypertrophy model                                               |
|          |    | cognition                                                       |
|          |    | regulation of organic acid transport                            |
|          |    | negative regulation of phosphorus metabolic process             |
|          |    | learning or memory                                              |
|          |    | regulation of protein transport                                 |
|          |    | Transport of small molecules                                    |
|          |    | PIP3 activates AKT signaling                                    |
|          |    | Intracellular signaling by second messengers                    |
|          |    | regulation of cellular amide metabolic process                  |
|          |    | PID HIF2PATHWAY                                                 |
|          |    | positive regulation of protein secretion                        |
|          |    | regulation of establishment of protein localization             |
|          |    | negative regulation of transferase activity                     |
|          |    | positive regulation of catabolic process                        |
|          |    | import into cell                                                |
|          |    | Signaling by Receptor Tyrosine Kinases                          |
|          |    | positive regulation of amino acid transport                     |
|          |    | B cell receptor signaling pathway                               |
|          |    | glutamate metabolic process                                     |
|          |    | dicarboxylic acid transport                                     |
|          |    | lipid biosynthetic process                                      |
|          |    | macromolecule methylation                                       |
|          |    | Cellular responses to stress                                    |
|          |    | negative regulation of cysteine-type endopeptidase activity     |
|          |    | protein processing                                              |
|          |    | macroautophagy                                                  |
|          |    | lipid modification                                              |
|          |    | regulation of proteolysis                                       |
|          |    | Bladder cancer                                                  |
|          |    | process utilizing autophagic mechanism                          |
|          |    | Signaling by NTRK1 (TRKA)                                       |
|          |    | alcohol metabolic process                                       |

## Bioinformatics analysis of membranous nephropathy

|      |     |                                                                                                 |
|------|-----|-------------------------------------------------------------------------------------------------|
|      |     | response to amine                                                                               |
|      |     | response to topologically incorrect protein                                                     |
|      |     | regulation of protein stability                                                                 |
|      |     | protein maturation                                                                              |
|      |     | negative regulation of kinase activity                                                          |
|      |     | endomembrane system organization                                                                |
|      |     | positive regulation of protein catabolic process                                                |
|      |     | methylation                                                                                     |
|      |     | Insulin signaling                                                                               |
|      |     | protein stabilization                                                                           |
|      |     | autophagy                                                                                       |
|      |     | steroid biosynthetic process                                                                    |
|      |     | PTEN Regulation                                                                                 |
|      |     | vesicle organization                                                                            |
|      |     | Regulation of autophagy                                                                         |
|      |     | negative regulation of protein phosphorylation                                                  |
|      |     | regulation of protein catabolic process                                                         |
|      |     | regionalization                                                                                 |
|      |     | steroid metabolic process                                                                       |
|      |     | Vesicle-mediated transport                                                                      |
|      |     | metanephros morphogenesis                                                                       |
|      |     | negative regulation of autophagy                                                                |
|      |     | negative regulation of cellular catabolic process                                               |
|      |     | positive regulation of lipid storage                                                            |
|      |     | positive regulation of cellular catabolic process                                               |
|      |     | negative regulation of phosphate metabolic process                                              |
|      |     | Focal adhesion: PI3K-Akt-mTOR-signaling pathway                                                 |
|      |     | regulation of autophagy                                                                         |
|      |     | negative regulation of phosphorylation                                                          |
|      |     | PID CMYB PATHWAY                                                                                |
|      |     | astrocyte development                                                                           |
|      |     | Signaling by NTRKs                                                                              |
|      |     | import across plasma membrane                                                                   |
|      |     | PID P53 DOWNSTREAM PATHWAY                                                                      |
| Glom | 360 | tissue regeneration                                                                             |
|      |     | Extracellular matrix organization                                                               |
|      |     | Development of ureteric collection system                                                       |
|      |     | CD4-positive, alpha-beta T cell differentiation                                                 |
|      |     | regulation of cell cycle G1/S phase transition                                                  |
|      |     | positive regulation of transmembrane receptor protein serine/threonine kinase signaling pathway |
|      |     | tumor necrosis factor superfamily cytokine production                                           |
|      |     | mononuclear cell migration                                                                      |
|      |     | cellular component assembly involved in morphogenesis                                           |
|      |     | negative regulation of T cell activation                                                        |
|      |     | regulation of cytokine production involved in immune response                                   |
|      |     | histone deacetylation                                                                           |
|      |     | alpha-beta T cell differentiation                                                               |
|      |     | heart valve development                                                                         |
|      |     | Pre-NOTCH Expression and Processing                                                             |
|      |     | actin filament organization                                                                     |
|      |     | ion homeostasis                                                                                 |
|      |     | Central carbon metabolism in cancer                                                             |
|      |     | chondrocyte differentiation                                                                     |

## Bioinformatics analysis of membranous nephropathy

Fc $\gamma$  receptor (FCGR) dependent phagocytosis  
regulation of nervous system development  
regulation of exocytosis  
positive regulation of immune effector process  
regulation of anoikis  
axon guidance  
Hypertrophic cardiomyopathy (HCM)  
epithelial cell differentiation involved in kidney development  
regulation of lymphocyte activation  
extracellular matrix assembly  
receptor metabolic process  
muscle organ morphogenesis  
negative regulation of chemotaxis  
positive regulation of hemopoiesis  
positive regulation of calcium ion transport  
negative regulation of cell development  
cartilage development  
regulation of CD4-positive, alpha-beta T cell differentiation  
Initiation of transcription and translation elongation at the HIV-1 LTR  
regulation of tumor necrosis factor production  
mucopolysaccharide metabolic process  
cell activation involved in immune response  
cell cycle G1/S phase transition  
neural crest cell differentiation  
cellular response to radiation  
NABA MATRISOME ASSOCIATED  
positive regulation of gliogenesis  
positive regulation of extracellular matrix organization  
regulation of Notch signaling pathway  
positive regulation of cell development  
negative regulation of neuron death  
Cytokine-cytokine receptor interaction  
GPCR ligand binding  
cellular ion homeostasis  
muscle cell development  
oligodendrocyte differentiation  
negative regulation of cell growth  
positive regulation of transcription from RNA polymerase II promoter involved in cellular response to chemical stimulus  
positive regulation of leukocyte cell-cell adhesion  
Proteoglycans in cancer  
regulation of adaptive immune response  
phagocytosis  
angiogenesis involved in wound healing  
integrin-mediated signaling pathway  
negative regulation of nervous system development  
negative regulation of DNA metabolic process  
Pre-NOTCH Transcription and Translation  
regulation of extracellular matrix organization  
morphogenesis of an epithelial sheet  
protein deacylation  
bone mineralization  
T cell differentiation

## Bioinformatics analysis of membranous nephropathy

regulation of G1/S transition of mitotic cell cycle  
actomyosin structure organization  
negative regulation of cell cycle G1/S phase transition  
Th17 cell differentiation  
regulation of cytoskeleton organization  
cell part morphogenesis  
regulation of muscle cell differentiation  
positive regulation of T cell activation  
BMP signaling pathway  
regulation of epithelial to mesenchymal transition  
endocardial cushion formation  
Glioblastoma signaling pathways  
regulation of cell shape  
regulation of viral genome replication  
external encapsulating structure organization  
regulation of vesicle-mediated transport  
regulation of T cell activation  
regulation of biomineralization  
regulation of protein-containing complex assembly  
regulation of CD4-positive, alpha-beta T cell activation  
negative regulation of growth  
plasma membrane bounded cell projection morphogenesis  
regulation of gliogenesis  
Hepatitis B  
cardiac ventricle morphogenesis  
negative regulation of G1/S transition of mitotic cell cycle  
epithelial to mesenchymal transition  
extracellular matrix organization  
blood vessel remodeling  
T cell differentiation involved in immune response  
Signaling by TGFB family members  
glycosaminoglycan metabolic process  
positive regulation of epithelial cell migration  
Regulation of Insulin-like Growth Factor (IGF) transport and uptake by Insulin-like Growth Factor Binding Proteins (IGFBPs)  
negative regulation of locomotion  
cellular response to interferon-gamma  
Amoebiasis  
Epithelial to mesenchymal transition in colorectal cancer  
Osteoblast differentiation and related diseases  
negative regulation of biomineral tissue development  
Elastic fibre formation  
Primary focal segmental glomerulosclerosis (FSGS)  
cellular metal ion homeostasis  
cardiac ventricle development  
positive regulation of neuron differentiation  
negative regulation of immune effector process  
regulation of histone methylation  
Hippo-Merlin signaling dysregulation  
lymphocyte activation involved in immune response  
morphogenesis of a branching epithelium  
regulation of ossification  
regulation of alpha-beta T cell activation

## Bioinformatics analysis of membranous nephropathy

regulation of tumor necrosis factor superfamily cytokine production  
cell differentiation involved in kidney development  
cardiac muscle tissue morphogenesis  
regulation of lymphocyte proliferation  
alpha-beta T cell activation involved in immune response  
negative regulation of cellular response to growth factor stimulus  
positive regulation of MAPK cascade  
regulation of vascular permeability  
positive regulation of cytoskeleton organization  
response to estrogen  
cardiac chamber morphogenesis  
CD4-positive, alpha-beta T cell activation  
apoptotic mitochondrial changes  
negative regulation of cytokine production  
Th1 and Th2 cell differentiation  
Parasite infection  
Ras protein signal transduction  
negative regulation of cell migration involved in sprouting angiogenesis  
biomineral tissue development  
biomineralization  
cytokine production involved in immune response  
positive regulation of lymphocyte activation  
cation homeostasis  
Glycosaminoglycan metabolism  
morphogenesis of a branching structure  
RAC1 GTPase cycle  
negative regulation of epithelial cell migration  
regulation of Ras protein signal transduction  
positive regulation of glial cell differentiation  
negative regulation of leukocyte cell-cell adhesion  
ventricular septum development  
mitochondrial membrane organization  
ECM proteoglycans  
positive regulation of histone modification  
Shigellosis  
gliogenesis  
tumor necrosis factor production  
protein deacetylation  
regulation of membrane permeability  
positive regulation of leukocyte proliferation  
regulation of alpha-beta T cell differentiation  
cardiac septum development  
CD4-positive, alpha-beta T cell differentiation involved in immune response  
regulation of cytosolic calcium ion concentration  
Thyroid hormones production and peripheral downstream signaling effects  
leukocyte activation involved in immune response  
regulation of adaptive immune response based on somatic recombination of immune receptors  
built from immunoglobulin superfamily domains  
immune effector process  
regulation of cell migration involved in sprouting angiogenesis  
endocardial cushion development  
T-helper 1 type immune response  
Platelet degranulation



## Bioinformatics analysis of membranous nephropathy

regulation of leukocyte differentiation  
negative regulation of anoikis  
receptor internalization  
Non-integrin membrane-ECM interactions  
vesicle fusion  
Cell surface interactions at the vascular wall  
divalent inorganic cation homeostasis  
developmental maturation  
peptidyl-tyrosine phosphorylation  
NABA ECM GLYCOPROTEINS  
cell surface receptor signaling pathway involved in heart development  
extracellular structure organization  
regulation of production of molecular mediator of immune response  
semi-lunar valve development  
Leishmania phagocytosis  
Response to elevated platelet cytosolic  $Ca^{2+}$   
endocardial cushion morphogenesis  
cardiac septum morphogenesis  
inorganic ion homeostasis  
positive regulation of T cell proliferation  
positive regulation of production of molecular mediator of immune response  
vascular associated smooth muscle cell differentiation  
alpha-beta T cell activation  
metal ion homeostasis  
cell projection morphogenesis  
defense response to bacterium  
regulation of blood vessel endothelial cell migration  
response to interferon-alpha  
aminoglycan metabolic process  
positive regulation of protein-containing complex assembly  
Signaling by GPCR  
PID NOTCH PATHWAY  
Heart development  
Transcriptional regulation by RUNX3  
cell-substrate adhesion  
exocytosis  
neural crest cell migration  
lymphocyte differentiation  
positive regulation of epithelial to mesenchymal transition  
Inflammatory bowel disease (IBD)  
Nervous system development  
mesenchymal cell development  
negative regulation of Wnt signaling pathway  
NABA ECM AFFILIATED  
extracellular matrix disassembly  
cellular divalent inorganic cation homeostasis  
heart valve morphogenesis  
negative regulation of striated muscle cell differentiation  
regulation of small GTPase mediated signal transduction  
adaptive immune response based on somatic recombination of immune receptors built from immunoglobulin superfamily domains  
T-helper 1 cell differentiation  
cell-cell junction organization

## Bioinformatics analysis of membranous nephropathy

negative regulation of lymphocyte activation  
negative regulation of leukocyte activation  
extrinsic apoptotic signaling pathway  
positive regulation of T cell differentiation  
T cell activation involved in immune response  
neural crest cell development  
adenylate cyclase-activating G protein-coupled receptor signaling pathway  
Notch signaling pathway (Netpath)  
endothelial cell proliferation  
negative regulation of neurogenesis  
miRNA regulation of DNA damage response  
negative regulation of cell activation  
positive regulation of lymphocyte differentiation  
cell cycle phase transition  
regulation of T cell proliferation  
regulation of actin cytoskeleton organization  
regulation of extrinsic apoptotic signaling pathway  
Factors involved in megakaryocyte development and platelet production  
response to interferon-gamma  
positive regulation of nervous system development  
positive regulation of stress-activated protein kinase signaling cascade  
stem cell differentiation  
regulation of cell development  
neuron projection morphogenesis  
Burn wound healing  
peptidyl-tyrosine modification  
organelle membrane fusion  
T-helper 2 cell differentiation  
regulation of mononuclear cell proliferation  
cellular cation homeostasis  
regulation of histone modification  
positive regulation of organelle organization  
calcium ion homeostasis  
regulation of immune effector process  
ear development  
regulation of phagocytosis  
response to X-ray  
inner ear development  
B cell activation  
positive regulation of epithelial cell proliferation  
anatomical structure maturation  
negative regulation of blood vessel endothelial cell migration  
negative regulation of transmembrane receptor protein serine/threonine kinase signaling pathway  
neuron projection guidance  
histone modification  
alpha-beta T cell differentiation involved in immune response  
regulation of oligodendrocyte differentiation  
regulation of receptor signaling pathway via STAT  
regulation of protein kinase B signaling  
positive regulation of endothelial cell migration  
regulation of type 2 immune response  
aortic valve development  
lymphocyte migration

## Bioinformatics analysis of membranous nephropathy

positive regulation of neurogenesis  
skin development  
type 2 immune response  
negative regulation of biomineralization  
regulation of neurogenesis  
HIF-1 signaling pathway  
small GTPase mediated signal transduction  
regulation of leukocyte apoptotic process  
Ebola virus pathway in host  
gland morphogenesis  
NABA CORE MATRISOME  
PID LYSOPHOSPHOLIPID PATHWAY  
negative regulation of immune system process  
cardiac chamber development  
cell morphogenesis involved in neuron differentiation  
mesenchyme morphogenesis  
sensory organ development  
Lung fibrosis  
Diseases of glycosylation  
macromolecule deacylation  
regulation of neuron differentiation  
Dilated cardiomyopathy  
regulation of hemopoiesis  
response to light stimulus  
myotube differentiation  
regulation of actin filament-based process  
response to UV  
Neovascularisation processes  
regulation of leukocyte proliferation  
Basal cell carcinoma  
hematopoietic progenitor cell differentiation  
regulation of biomineral tissue development  
muscle tissue morphogenesis  
Axon guidance  
negative regulation of transforming growth factor beta receptor signaling pathway  
muscle adaptation  
negative regulation of mitotic cell cycle  
PID THROMBIN PAR1 PATHWAY  
regulation of mitochondrial membrane permeability  
MicroRNAs in cancer  
regulation of glial cell differentiation  
regulation of extracellular matrix assembly  
FCGR3A-mediated phagocytosis  
axonogenesis  
negative regulation of protein catabolic process  
cellular response to vascular endothelial growth factor stimulus  
cell fate commitment  
regulation of lymphocyte differentiation  
Regulation of actin dynamics for phagocytic cup formation  
positive regulation of cytosolic calcium ion concentration  
positive regulation of endothelial cell proliferation  
positive regulation of leukocyte differentiation  
aortic valve morphogenesis

## Bioinformatics analysis of membranous nephropathy

stem cell development  
regulation of protein binding  
positive regulation of ERK1 and ERK2 cascade  
anoikis  
T-helper cell differentiation  
platelet activation  
thyroid hormone signaling pathway  
negative regulation of muscle cell differentiation  
Acute viral myocarditis  
positive regulation of stress-activated MAPK cascade  
regulation of bone mineralization  
leukocyte apoptotic process  
Deubiquitination  
atrioventricular valve development  
leukocyte migration  
cellular component morphogenesis  
striated muscle cell differentiation  
G alpha (q) signalling events  
regulation of endothelial cell proliferation  
positive regulation of protein kinase B signaling  
regulation of MAPK cascade  
cellular calcium ion homeostasis  
G1/S transition of mitotic cell cycle  
positive regulation of blood vessel endothelial cell migration  
regulation of neural precursor cell proliferation  
cardiac epithelial to mesenchymal transition  
regulation of striated muscle cell differentiation

Tub 1008 Ovarian infertility  
regulation of amino acid import across plasma membrane  
detoxification  
Defects in cobalamin (B12) metabolism  
Citrate cycle (TCA cycle)  
Neural crest cell migration in cancer  
response to zinc ion  
PID AVB3 OPN PATHWAY  
energy derivation by oxidation of organic compounds  
negative regulation of viral process  
p53 transcriptional gene network  
amino sugar metabolic process  
MyD88 dependent cascade initiated on endosome  
plasma lipoprotein particle organization  
regulation of ion transport  
aspartate family amino acid metabolic process  
Regulation of TLR by endogenous ligand  
regulation of nuclear-transcribed mRNA poly(A) tail shortening  
deoxyribose phosphate metabolic process  
Transmission across Chemical Synapses  
chronic inflammatory response  
negative regulation of macrophage derived foam cell differentiation  
Tryptophan metabolism  
glucan metabolic process  
Glutamate Neurotransmitter Release Cycle  
carboxylic acid transmembrane transport

## Bioinformatics analysis of membranous nephropathy

supramolecular fiber organization  
negative regulation of ion transport  
cholesterol storage  
response to xenobiotic stimulus  
regulation of phospholipid metabolic process  
catecholamine biosynthetic process  
NIK/NF-kappaB signaling  
fatty acid biosynthetic process  
NF-kappaB signaling pathway  
regulation of transcription from RNA polymerase II promoter in response to stress  
Initial triggering of complement  
renal vesicle development  
alpha-amino acid metabolic process  
alpha-amino acid catabolic process  
response to salt stress  
regulation of biological process involved in symbiotic interaction  
peptide secretion  
SREBF and miR33 in cholesterol and lipid homeostasis  
organophosphate ester transport  
interleukin-5 production  
deoxyribonucleotide metabolic process  
PID P38 ALPHA BETA DOWNSTREAM PATHWAY  
alpha-amino acid biosynthetic process  
establishment of protein localization to extracellular region  
Oxidative Stress Induced Senescence  
Signaling by Nuclear Receptors  
Carbon metabolism  
positive regulation of cysteine-type endopeptidase activity involved in apoptotic process  
organic hydroxy compound biosynthetic process  
endothelium development  
positive regulation of sterol transport  
fatty acid oxidation  
nitrogen cycle metabolic process  
regulation of sterol transport  
regulation of endopeptidase activity  
MECP2 regulates neuronal receptors and channels  
pteridine-containing compound metabolic process  
negative regulation of response to wounding  
NR1H3 & NR1H2 regulate gene expression linked to cholesterol transport and efflux  
Proximal tubule transport  
primary alcohol metabolic process  
positive regulation of neuron death  
ABC transporters  
protein-lipid complex subunit organization  
peptidyl-proline modification  
positive regulation of heart contraction  
cellular modified amino acid metabolic process  
receptor-mediated endocytosis  
negative regulation of mitochondrion organization  
oligosaccharide metabolic process  
regulation of cholesterol transport  
aspartate family amino acid catabolic process  
regulation of nucleotide metabolic process

## Bioinformatics analysis of membranous nephropathy

cardiocyte differentiation  
NR1H2 and NR1H3-mediated signaling  
MAPK targets/Nuclear events mediated by MAP kinases  
phospholipid biosynthetic process  
positive regulation of glucose transmembrane transport  
regulation of ATP metabolic process  
glycosyl compound catabolic process  
regulation of system process  
lipid homeostasis  
response to arsenic-containing substance  
neutral lipid biosynthetic process  
leukocyte migration involved in inflammatory response  
sphingolipid metabolic process  
regulation of peptidase activity  
nucleic acid phosphodiester bond hydrolysis  
PID P75 NTR PATHWAY  
serine family amino acid catabolic process  
Staphylococcus aureus infection  
protein localization to membrane  
Longevity regulating pathway  
Thyroid stimulating hormone (TSH) signaling pathway  
behavior  
Defects in vitamin and cofactor metabolism  
thioester metabolic process  
cellular response to toxic substance  
TP53 Regulates Transcription of DNA Repair Genes  
cellular response to interleukin-4  
response to cold  
toll-like receptor 4 signaling pathway  
regulation of coagulation  
positive regulation of response to wounding  
platelet-derived growth factor receptor signaling pathway  
positive regulation of leukocyte chemotaxis  
regulation of type B pancreatic cell proliferation  
regulation of ketone biosynthetic process  
positive regulation of fatty acid oxidation  
cellular response to lipoprotein particle stimulus  
ATP generation from ADP  
regulation of generation of precursor metabolites and energy  
nucleoside phosphate metabolic process  
PID ATF2 PATHWAY  
organelle fusion  
regulation of cellular carbohydrate metabolic process  
GABA biosynthesis, eukaryotes, putrescine  $\geq$  GABA  
Toll-like receptor signaling pathway  
regulation of interleukin-5 production  
regulation of cholesterol efflux  
positive regulation of blood coagulation  
protein dephosphorylation  
T cell apoptotic process  
maintenance of gastrointestinal epithelium  
catecholamine metabolic process  
response to organophosphorus

## Bioinformatics analysis of membranous nephropathy

positive regulation of macrophage activation  
protein peptidyl-prolyl isomerization  
lipid localization  
Cholesterol biosynthesis  
folic acid transport  
macrophage derived foam cell differentiation  
cellular response to growth hormone stimulus  
Proximal tubule bicarbonate reclamation  
fatty acid catabolic process  
MyD88: MAL (TIRAP) cascade initiated on plasma membrane  
metanephric epithelium development  
protein localization to extracellular region  
Resolution of Abasic Sites (AP sites)  
Alanine, aspartate and glutamate metabolism  
protein secretion  
regulation of hemostasis  
Alanine and aspartate metabolism  
activation of cysteine-type endopeptidase activity involved in apoptotic process  
smooth muscle cell proliferation  
amino acid import  
fatty acid metabolic process  
regulation of secretion  
monosaccharide biosynthetic process  
NAD metabolic process  
Estrogen receptor pathway  
metanephric nephron development  
response to mineralocorticoid  
Ethanol effects on histone modifications  
Regulation of toll-like receptor signaling pathway  
high-density lipoprotein particle remodeling  
glycogen metabolic process  
circadian entrainment  
positive regulation of immune response  
release of cytochrome c from mitochondria  
Protein localization  
cholesterol homeostasis  
negative regulation of myeloid cell differentiation  
cellular response to reactive nitrogen species  
programmed necrotic cell death  
SLC-mediated transmembrane transport  
Transcriptional misregulation in cancer  
regulation of phosphatidylinositol 3-kinase activity  
G1/S Transition  
nephron epithelium morphogenesis  
sterol transport  
regulation of toll-like receptor 3 signaling pathway  
intracellular cholesterol transport  
nucleoside diphosphate metabolic process  
reverse cholesterol transport  
Toll Like Receptor 10 (TLR10) Cascade  
Golgi to endosome transport  
negative regulation of plasminogen activation  
protein homotetramerization

## Bioinformatics analysis of membranous nephropathy

Oxysterols derived from cholesterol  
PID NFKAPPAB CANONICAL PATHWAY  
vitamin transport  
Interferon Signaling  
Citrate cycle (TCA cycle, Krebs cycle)  
regulation of peptide hormone secretion  
mesonephric epithelium development  
PID MYC REPRESS PATHWAY  
macrophage activation  
I-kappaB kinase/NF-kappaB signaling  
regulation of lipoprotein particle clearance  
regulation of transmembrane transport  
positive regulation of digestive system process  
positive regulation of coagulation  
neutral lipid metabolic process  
carbohydrate derivative catabolic process  
Metabolism of amino acids and derivatives  
urea metabolic process  
aromatic amino acid family metabolic process  
Gluconeogenesis, oxaloacetate  $\geq$  fructose-6P  
regulation of kidney development  
Defective Intrinsic Pathway for Apoptosis  
positive regulation of branching involved in ureteric bud morphogenesis  
positive regulation of cellular response to transforming growth factor beta stimulus  
cellular response to amino acid starvation  
regulation of protein processing  
positive regulation of lipid transport  
tertiary alcohol metabolic process  
Cholesterol metabolism with Bloch and Kandutsch-Russell pathways  
Glycolysis/Gluconeogenesis  
response to cAMP  
regulation of epidermal cell differentiation  
amide transport  
Phenylalanine metabolism  
oligosaccharide catabolic process  
myeloid leukocyte activation  
TGF-beta receptor signaling  
acute inflammatory response  
Growth hormone receptor signaling  
Vitamin digestion and absorption  
glucosamine-containing compound metabolic process  
Aberrant regulation of mitotic G1/S transition in cancer due to RB1 defects  
intracellular sterol transport  
regulation of cholesterol storage  
regulation of epidermis development  
negative regulation of tissue remodeling  
NOD-like receptor signaling pathway  
positive regulation of peptidase activity  
response to endoplasmic reticulum stress  
vitamin transmembrane transport  
nucleoside phosphate biosynthetic process  
Influenza A  
PID HIF1 TFPATHWAY



## Bioinformatics analysis of membranous nephropathy

Toll Like Receptor 7/8 (TLR7/8) Cascade  
Starch and sucrose metabolism  
2-oxoglutarate metabolic process  
vascular process in circulatory system  
nucleotide phosphorylation  
vascular wound healing  
PID RB 1PATHWAY  
regulation of DNA-templated transcription, initiation  
regulation of smooth muscle cell proliferation  
SA G1 AND S PHASES  
regulation of phosphatidylcholine catabolic process  
glycoprotein metabolic process  
generation of precursor metabolites and energy  
amine biosynthetic process  
Circadian rhythm genes  
cholesterol metabolic process  
multicellular organismal homeostasis  
PID TAP63 PATHWAY  
Statin inhibition of cholesterol production  
L-phenylalanine catabolic process  
protein-containing complex remodeling  
Toll Like Receptor TLR1:TLR2 Cascade  
purine nucleoside bisphosphate metabolic process  
dephosphorylation  
Transcriptional Regulation by E2F6  
positive regulation of smooth muscle cell proliferation  
Toll Like Receptor 2 (TLR2) Cascade  
Cellular response to chemical stress  
regulation of triglyceride biosynthetic process  
nucleotide-binding oligomerization domain containing signaling pathway  
regulation of nuclear-transcribed mRNA catabolic process, deadenylation-dependent decay  
erythrose 4-phosphate/phosphoenolpyruvate family amino acid catabolic process  
positive regulation of lipid metabolic process  
Glyoxylate metabolism and glycine degradation  
inositol lipid-mediated signaling  
regulation of bone remodeling  
positive regulation of organic acid transport  
Endochondral ossification  
steroid hormone biosynthetic process  
mesonephric tubule development  
response to aluminum ion  
myeloid leukocyte migration  
bone resorption  
regulation of protein maturation  
pentose-phosphate shunt  
negative regulation of peptidase activity  
Pertussis  
zymogen activation  
cellular response to starvation  
Apoptosis  
glycerolipid catabolic process  
cellular response to extracellular stimulus  
Jak-STAT signaling pathway

## Bioinformatics analysis of membranous nephropathy

sterol homeostasis  
otic vesicle development  
ribonucleotide metabolic process  
plasminogen activation  
labyrinthine layer development  
Scavenging by Class A Receptors  
viral transcription  
catechol-containing compound biosynthetic process  
Glucocorticoid receptor pathway  
regulation of cysteine-type endopeptidase activity  
insulin secretion  
response to hexose  
Arginine biosynthesis  
membrane fusion  
carboxylic acid biosynthetic process  
PID SMAD2 3NUCLEAR PATHWAY  
hormone secretion  
regulation of T cell apoptotic process  
Immune response to tuberculosis  
regulation of gonad development  
organic anion transport  
positive regulation of blood pressure  
FOXO-mediated transcription of oxidative stress, metabolic and neuronal genes  
blood vessel diameter maintenance  
PID RXR VDR PATHWAY  
N-acetylglucosamine metabolic process  
regulation of leukocyte chemotaxis  
Mitochondrial Fatty Acid Beta-Oxidation  
viral gene expression  
carbohydrate derivative transport  
nucleoside bisphosphate metabolic process  
cellular response to glucocorticoid stimulus  
notochord development  
PID FOXO PATHWAY  
regulation of mitochondrial fusion  
cellular response to glucose stimulus  
tricarboxylic acid metabolic process  
regulation of macrophage activation  
negative regulation of nucleotide metabolic process  
cellular lipid catabolic process  
Photodynamic therapy-induced HIF-1 survival signaling  
TRIF (TICAM1)-mediated TLR4 signaling  
Malonate semialdehyde pathway, propanoyl-CoA  $\geq$  acetyl-CoA  
TNF signaling pathway  
cellular response to corticosteroid stimulus  
Urea cycle and metabolism of amino groups  
peptidyl-cysteine S-nitrosylation  
glycerolipid metabolic process  
cellular aldehyde metabolic process  
cellular response to inorganic substance  
blood circulation  
phospholipid efflux  
Orexin receptor pathway

## Bioinformatics analysis of membranous nephropathy

cellular amino acid catabolic process  
defense response to symbiont  
sterol metabolic process  
NAD biosynthetic process  
phosphate ion transport  
Glutathione metabolism  
glucose homeostasis  
Peroxisomal protein import  
cellular response to xenobiotic stimulus  
cholesterol transport  
L-alpha-amino acid transmembrane transport  
positive regulation of proteolysis  
regulation of I-kappaB kinase/NF-kappaB signaling  
amino acid transport  
Fatty acid biosynthesis  
regulation of bone resorption  
MECP2 and associated Rett syndrome  
Phenylalanine and tyrosine metabolism  
lipoprotein metabolic process  
regulation of carbohydrate catabolic process  
Apoptosis-related network due to altered Notch3 in ovarian cancer  
Pyruvate metabolism  
regulation of peptide transport  
doxorubicin metabolic process  
carbohydrate derivative biosynthetic process  
polyketide metabolic process  
type B pancreatic cell proliferation  
mesoderm development  
negative regulation of glycolytic process  
positive regulation of inflammatory response  
positive regulation of steroid metabolic process  
2'-deoxyribonucleotide metabolic process  
response to fatty acid  
circadian regulation of gene expression  
PPAR signaling pathway  
intracellular lipid transport  
positive regulation of cysteine-type endopeptidase activity  
PPARA activates gene expression  
renal water homeostasis  
medium-chain fatty acid metabolic process  
Complement and coagulation cascades  
ER-nucleus signaling pathway  
Nonalcoholic fatty liver disease  
beta-Alanine metabolism  
Pentose phosphate pathway  
plasma lipoprotein particle assembly  
protein-lipid complex remodeling  
Cyclin D associated events in G1  
phenol-containing compound metabolic process  
Oxytocin signaling pathway  
TRAF6 mediated induction of NFkB and MAP kinases upon TLR7/8 or 9 activation  
amino acid transmembrane transport  
regulation of lipid storage

## Bioinformatics analysis of membranous nephropathy

FOXO-mediated transcription  
acylglycerol metabolic process  
Dissolution of Fibrin Clot  
Retinoid metabolism and transport  
PID TELOMERASE PATHWAY  
cellular nitrogen compound catabolic process  
acetyl-CoA metabolic process  
organophosphate catabolic process  
Mitophagy-animal  
cellular biogenic amine metabolic process  
cholesterol efflux  
positive regulation of I-kappaB kinase/NF-kappaB signaling  
vasodilation  
biological process involved in symbiotic interaction  
positive regulation of response to external stimulus  
negative regulation of cold-induced thermogenesis  
negative regulation of blood coagulation  
negative regulation of anion transport  
regulation of purine nucleotide metabolic process  
protein nitrosylation  
regulation of blood coagulation  
PID HNF3B PATHWAY  
response to osmotic stress  
Transcriptional regulation of white adipocyte differentiation  
heterocycle catabolic process  
NRF2 pathway  
Toll Like Receptor TLR6:TLR2 Cascade  
metanephric nephron tubule morphogenesis  
PID FRA PATHWAY  
water-soluble vitamin metabolic process  
monocarboxylic acid biosynthetic process  
pancreas development  
Glycolysis and gluconeogenesis  
epithelial cell apoptotic process  
cellular response to metal ion  
leukocyte aggregation  
myeloid cell differentiation  
organic acid transport  
Arachidonic acid metabolism  
low-density lipoprotein particle clearance  
cellular biogenic amine biosynthetic process  
Glucose metabolism  
regulation of anion transmembrane transport  
cellular response to hypoxia  
PID ERBB1 DOWNSTREAM PATHWAY  
response to monosaccharide  
regulation of toll-like receptor signaling pathway  
negative regulation of protein serine/threonine kinase activity  
glucose 6-phosphate metabolic process  
digestion  
fructose metabolic process  
SNARE interactions in vesicular transport  
muscle cell proliferation

## Bioinformatics analysis of membranous nephropathy

Biological oxidations  
regulation of plasma lipoprotein particle levels  
regulation of mitochondrion organization  
positive regulation of lipid localization  
amino acid import across plasma membrane  
STING pathway in Kawasaki-like disease and COVID-19  
Influence of laminopathies on Wnt signaling  
Asparagine N-linked glycosylation  
response to cadmium ion  
regulation of phosphatidylcholine metabolic process  
RNA Polymerase I Transcription Initiation  
G protein-coupled receptor signaling pathway involved in heart process  
response to testosterone  
PID AURORA A PATHWAY  
protein tetramerization  
nucleotide biosynthetic process  
regulation of systemic arterial blood pressure mediated by a chemical signal  
monocarboxylic acid metabolic process  
MyD88-independent TLR4 cascade  
regulation of branching involved in ureteric bud morphogenesis  
regulation of acute inflammatory response  
response to calcium ion  
fatty acid beta-oxidation  
intestinal absorption  
Diseases of carbohydrate metabolism  
leukocyte chemotaxis  
phosphatidylcholine catabolic process  
negative regulation of fibrinolysis  
erythrose 4-phosphate/phosphoenolpyruvate family amino acid metabolic process  
foam cell differentiation  
high-density lipoprotein particle assembly  
pancreatic juice secretion  
neural tube formation  
regulation of amino acid transmembrane transport  
secondary alcohol metabolic process  
C21-steroid hormone biosynthetic process  
PID CD40 PATHWAY  
positive regulation of cholesterol transport  
glycosphingolipid catabolic process  
ribose phosphate biosynthetic process  
response to toxic substance  
Propanoate metabolism  
Ferroptosis  
Regulation of lipid metabolism by PPARalpha  
regulation of macrophage derived foam cell differentiation  
Potential therapeutics for SARS  
Fatty acid degradation  
Photodynamic therapy-induced NFE2L2 (NRF2) survival signaling  
acyl-CoA metabolic process  
neurotransmitter metabolic process  
cell proliferation involved in kidney development  
pyridine-containing compound biosynthetic process

## Bioinformatics analysis of membranous nephropathy

signal release  
regulation of hormone levels  
positive regulation of hemostasis  
purine ribonucleoside diphosphate metabolic process  
mesonephros development  
Wnt signaling pathway and pluripotency  
nucleobase-containing small molecule metabolic process  
defense response to Gram-negative bacterium  
RIPK1-mediated regulated necrosis  
growth hormone receptor signaling pathway  
lipid storage  
positive regulation of muscle tissue development  
Nuclear receptors in lipid metabolism and toxicity  
Dopaminergic synapse  
positive regulation of epithelial cell differentiation  
regulation of macroautophagy  
NADP metabolic process  
astrocyte differentiation  
positive regulation of hydrolase activity  
nucleotide metabolic process  
Osteoclast differentiation  
anion transmembrane transport  
regulation of cyclin-dependent protein kinase activity  
cellular carbohydrate catabolic process  
homotypic cell-cell adhesion  
carbohydrate homeostasis  
negative regulation of viral transcription  
amine transport  
NADH metabolic process  
negative regulation of bone remodeling  
regulation of digestive system process  
Myometrial relaxation and contraction pathways  
PID TOLL ENDOGENOUS PATHWAY  
IL-5 signaling pathway  
nicotinamide nucleotide biosynthetic process  
movement in host environment  
negative regulation of macroautophagy  
negative regulation of epithelial cell proliferation  
epithelial tube formation  
entry into host  
ETS2-FOS-JUN complex  
Leishmaniasis  
cellular amino acid biosynthetic process  
negative regulation of bone resorption  
regulation of homotypic cell-cell adhesion  
positive regulation of anion transport  
mitochondrion organization  
phospholipid homeostasis  
regulation of secretion by cell  
positive regulation of DNA-binding transcription factor activity  
toll-like receptor signaling pathway  
DNA Repair  
IL-4 signaling pathway

## Bioinformatics analysis of membranous nephropathy

skeletal muscle cell differentiation  
smooth muscle tissue development  
lymphocyte apoptotic process  
negative regulation of protein kinase activity  
cellular response to fatty acid  
response to activity  
DNA repair pathways, full network  
Phagosome  
ribonucleoside diphosphate metabolic process  
Salmonella infection  
regulation of fatty acid metabolic process  
regulation of progesterone biosynthetic process  
autocrine signaling  
regulation of fibrinolysis  
TCA cycle and deficiency of pyruvate dehydrogenase complex (PDHc)  
cold-induced thermogenesis  
IRAK4 deficiency (TLR2/4)  
catechol-containing compound metabolic process  
modulation of process of other organism  
response to magnesium ion  
Insulin signaling pathway  
regulation of protein secretion  
c-Fos-c-Jun-SAF-1 complex  
positive regulation of secretion  
regulation of osteoblast differentiation  
cellular carbohydrate metabolic process  
negative regulation of amino acid transport  
G1 Phase  
Copper homeostasis  
cellular response to oxygen levels  
TGF-beta receptor signaling in skeletal dysplasias  
positive regulation of fat cell differentiation  
negative regulation of lipid localization  
SARS-CoV-2 innate immunity evasion and cell-specific immune response  
dicarboxylic acid metabolic process  
Lysine degradation  
protein-lipid complex assembly  
carbohydrate catabolic process  
regulation of myeloid cell differentiation  
toll-like receptor 3 signaling pathway  
positive regulation of nitric-oxide synthase activity  
NADPH regeneration  
O<sub>2</sub>/CO<sub>2</sub> exchange in erythrocytes  
Farnesoid X receptor pathway  
MyD88 deficiency (TLR2/4)  
defense response to virus  
glycerophospholipid metabolic process  
intrinsic apoptotic signaling pathway  
negative regulation of coagulation  
response to growth hormone  
Defective binding of RB1 mutants to E2F1, (E2F2, E2F3)  
L-amino acid transport

## Bioinformatics analysis of membranous nephropathy

Protein digestion and absorption  
Vitamin B12 disorders  
AMPK signaling pathway  
serine family amino acid metabolic process  
tricarboxylic acid cycle  
phospholipid catabolic process  
organic cyclic compound catabolic process  
PID HNF3A PATHWAY  
regulation of lipid catabolic process  
Type I collagen synthesis in the context of osteogenesis imperfecta  
maintenance of location  
Unfolded Protein Response (UPR)  
acetyl-CoA biosynthetic process  
Metapathway biotransformation Phase I and II  
Cholesterol biosynthesis pathway  
ureteric bud development  
insulin resistance  
Diseases of Immune System  
p38MAPK cascade  
pyrimidine deoxyribonucleotide catabolic process  
deoxyribonucleotide catabolic process  
Eicosanoid metabolism via cytochrome P450 monooxygenases (CYP) pathway  
ceramide catabolic process  
Neuronal System  
hormone transport  
purine-containing compound metabolic process  
Circadian Clock  
PPAR-alpha pathway  
Sterol regulatory element-binding proteins (SREBP) signaling  
regulation of lipid kinase activity  
protein localization to plasma membrane  
purine nucleotide biosynthetic process  
acute-phase response  
anion transport  
Oncostatin M signaling pathway  
regulation of amino acid transport  
NADH oxidation  
regulation of systemic arterial blood pressure  
Photodynamic therapy-induced AP-1 survival signaling  
neuroepithelial cell differentiation  
bone remodeling  
lipid oxidation  
hexose biosynthetic process  
negative regulation of hydrolase activity  
RANKL/RANK signaling pathway  
Neuroinflammation and glutamatergic signaling  
N-glycan antennae elongation in the medial/trans-Golgi  
Amphetamine addiction  
RHO GTPase cycle  
regulation of peptide secretion  
coenzyme A metabolic process  
Programmed Cell Death



## Bioinformatics analysis of membranous nephropathy

### PID CD8 TCR DOWNSTREAM PATHWAY

Tyrosine metabolism  
response to vitamin E  
organic hydroxy compound transport  
viral entry into host cell  
carboxylic acid catabolic process  
cellular response to low-density lipoprotein particle stimulus

### PID NFAT TFPATHWAY

positive regulation of cellular respiration  
regulation of phospholipid catabolic process  
SARS-CoV Infections  
Plasma lipoprotein assembly, remodeling, and clearance  
amyloid fibril formation  
negative regulation of lipid storage  
thioester biosynthetic process  
Erythrocytes take up oxygen and release carbon dioxide  
Selenium micronutrient network  
regulation of blood pressure  
Arginine and proline metabolism  
cellular amino acid metabolic process  
interleukin-2 production  
positive regulation of defense response  
glycolytic process  
regulation of toll-like receptor 4 signaling pathway  
olefinic compound biosynthetic process  
organic hydroxy compound metabolic process  
Mitochondrial long chain fatty acid beta-oxidation  
Fat digestion and absorption  
Glycogen storage diseases  
positive regulation of cholesterol efflux  
quinone metabolic process  
negative regulation of T cell apoptotic process  
fibrinolysis  
cellular response to carbohydrate stimulus  
response to lead ion  
daunorubicin metabolic process  
Angiopietin-like protein 8 regulatory pathway  
organic cation transport  
myoblast differentiation  
positive regulation of hormone metabolic process  
Gluconeogenesis  
positive regulation of transcription from RNA polymerase II promoter in response to stress  
negative regulation of lipid transport  
sulfur compound metabolic process  
nicotinamide nucleotide metabolic process  
Adipocytokine signaling pathway  
beta-Oxidation

### PID BCR 5PATHWAY

pyridine nucleotide metabolic process  
activation of NF-kappaB-inducing kinase activity  
cellular glucan metabolic process  
positive regulation of chemotaxis  
Apelin signaling pathway

## Bioinformatics analysis of membranous nephropathy

regulation of cysteine-type endopeptidase activity involved in apoptotic process  
high-density lipoprotein particle clearance  
phosphatidylinositol 3-kinase signaling  
amyloid-beta clearance  
PID IL6 7 PATHWAY  
RAF-independent MAPK1/3 activation  
olefinic compound metabolic process  
negative regulation of organic acid transport  
response to tumor necrosis factor  
T-cell antigen receptor (TCR) pathway during Staphylococcus aureus infection  
PDGF pathway  
cyclic-nucleotide-mediated signaling  
activation of immune response  
MyD88 cascade initiated on plasma membrane  
intracellular receptor signaling pathway  
cell chemotaxis  
Host-pathogen interaction of human coronaviruses-interferon induction  
response to ethanol  
regulation of lipid transport  
organic acid catabolic process  
Fluid shear stress and atherosclerosis  
protein complex oligomerization  
aromatic amino acid family catabolic process  
metanephric tubule development  
acyl-CoA biosynthetic process  
regulation of phosphatidylinositol 3-kinase signaling  
cellular detoxification  
thyroid hormone generation  
Toll Like Receptor 9 (TLR9) Cascade  
regulation of carbohydrate biosynthetic process  
triglyceride metabolic process  
Metabolism of water-soluble vitamins and cofactors  
Erythrocytes take up carbon dioxide and release oxygen  
circadian rhythm  
cardiac neural crest cell development involved in heart development  
Valine, leucine and isoleucine degradation  
glycosyl compound metabolic process  
positive regulation of fatty acid metabolic process  
L-phenylalanine metabolic process  
peptide hormone secretion  
pyridine nucleotide biosynthetic process  
regulation of plasminogen activation  
negative regulation of cysteine-type endopeptidase activity involved in apoptotic process  
PID ERA GENOMIC PATHWAY  
granulocyte migration  
acylglycerol biosynthetic process  
pyrimidine deoxyribonucleotide metabolic process  
muscle system process  
regulation of response to wounding  
pattern recognition receptor signaling pathway  
negative regulation of cholesterol storage  
RUNX1 interacts with co-factors whose precise effect on RUNX1 targets is not known  
Cellular Senescence

## Bioinformatics analysis of membranous nephropathy

granulocyte chemotaxis  
Regulation of PTEN gene transcription  
Toll Like Receptor 3 (TLR3) Cascade  
positive regulation of transcription from RNA polymerase II promoter in response to endoplasmic reticulum stress  
peptide transport  
positive regulation of hormone biosynthetic process  
plasma lipoprotein particle clearance  
muscle tissue development  
cellular response to thyroid hormone stimulus  
ATM signaling pathway  
positive regulation of triglyceride biosynthetic process  
Glycerolipid metabolism  
response to corticosterone  
Histidine metabolism  
regulation of transcription initiation from RNA polymerase II promoter  
cellular oxidant detoxification  
regulation of viral transcription  
response to carbohydrate  
regulation of fat cell differentiation  
regulation of interleukin-2 production  
response to interleukin-4  
positive regulation of NF-kappaB transcription factor activity  
Neuroinflammation  
negative regulation of wound healing  
positive regulation of neuron apoptotic process  
response to glucose  
regulation of DNA-binding transcription factor activity  
cAMP signaling pathway  
progesterone biosynthetic process  
gastrulation with mouth forming second  
amine metabolic process  
androgen metabolic process  
regulation of tube diameter  
ceramide metabolic process  
positive regulation of intrinsic apoptotic signaling pathway  
Plasma lipoprotein clearance  
neurotransmitter catabolic process  
regulation of cold-induced thermogenesis  
PGC-1-SRp40-SRp55-SRp75 complex  
Endochondral ossification with skeletal dysplasias  
Negative regulation of MAPK pathway  
Activation of gene expression by SREBF (SREBP)  
regulation of neurotransmitter levels  
Creation of C4 and C2 activators  
PID PDGFRB PATHWAY  
progesterone metabolic process  
regulation of transcription from RNA polymerase II promoter in response to hypoxia  
membrane raft organization  
SUMOylation of transcription cofactors  
TP53 network  
Peroxisomal lipid metabolism  
transcription initiation from RNA polymerase II promoter

## Bioinformatics analysis of membranous nephropathy

negative regulation of hemostasis  
Fluoropyrimidine activity  
response to metal ion  
left/right axis specification  
TNF-related weak inducer of apoptosis (TWEAK) signaling pathway  
pyrimidine nucleotide catabolic process  
regulation of monocyte differentiation  
Transport to the Golgi and subsequent modification  
Metabolic reprogramming in colon cancer  
Metabolism of vitamins and cofactors  
positive regulation of cold-induced thermogenesis  
Glyoxylate and dicarboxylate metabolism  
GABA metabolism (aka GHB)  
deoxyribose phosphate catabolic process  
cellular amine metabolic process  
monocarboxylic acid catabolic process  
plasma lipoprotein particle remodeling  
glycolipid catabolic process  
IL-2 signaling pathway  
morphogenesis of embryonic epithelium  
lipid transport  
positive regulation of wound healing  
body fluid secretion  
pronephros development  
purine-containing compound biosynthetic process  
SA B CELL RECEPTOR COMPLEXES  
mitophagy  
embryonic placenta development  
Complement activation  
purine nucleoside diphosphate metabolic process  
nucleoside diphosphate phosphorylation  
aminoglycoside antibiotic metabolic process  
regulation of intrinsic apoptotic signaling pathway  
Neural crest cell migration during development  
Amino acid metabolism  
Nuclear Receptor transcription pathway  
metanephric nephron tubule development  
Genotoxicity pathway  
response to purine-containing compound  
negative regulation of purine nucleotide metabolic process  
positive regulation of lipid biosynthetic process  
response to fructose  
triglyceride biosynthetic process  
kidney epithelium development  
Bile secretion  
regulation of epithelial cell apoptotic process  
cellular response to organic cyclic compound  
Lysine degradation, lysine ≥ saccharopine ≥ acetoacetyl-CoA  
glycerolipid biosynthetic process  
metanephric nephron morphogenesis  
Vitamin B12 metabolism  
digestive system process  
phospholipid transport

## Bioinformatics analysis of membranous nephropathy

regulation of insulin secretion  
cellular response to decreased oxygen levels  
Binding and Uptake of Ligands by Scavenger Receptors  
nephron tubule morphogenesis  
Apoptosis modulation and signaling  
MAP kinase activation  
phospholipid metabolic process  
positive regulation of nuclear-transcribed mRNA catabolic process, deadenylation-dependent decay  
cardiac neural crest cell differentiation involved in heart development  
cellular response to steroid hormone stimulus  
hydrogen peroxide metabolic process  
modified amino acid transport  
ribonucleoside bisphosphate metabolic process  
endocrine pancreas development  
axis specification  
toxin metabolic process  
regulation of triglyceride metabolic process  
regulation of cyclin-dependent protein serine/threonine kinase activity  
lipopolysaccharide-mediated signaling pathway  
T cell receptor signaling pathway  
negative regulation of endopeptidase activity  
Glycine, serine and threonine metabolism  
Ectoderm differentiation  
glycoside metabolic process  
regulation of glycolytic process  
Toll Like Receptor 5 (TLR5) Cascade  
Oxidative damage response  
biological process involved in interaction with host  
Interleukin-17 signaling  
Peroxisome  
Phase I-Functionalization of compounds  
amino sugar catabolic process  
Regulated Necrosis  
cellular response to osmotic stress  
neutral amino acid transport  
gluconeogenesis  
DNA-templated transcription, initiation  
temperature homeostasis  
cellular polysaccharide metabolic process  
Metabolism of amine-derived hormones  
Complement cascade  
Toll Like Receptor 4 (TLR4) Cascade  
cellular carbohydrate biosynthetic process  
cellular response to nutrient levels  
renal vesicle morphogenesis  
regulation of anion transport  
cellular response to hexose stimulus  
neural tube development  
Toll-like Receptor Cascades  
regulation of astrocyte differentiation  
sterol biosynthetic process  
PID PS1 PATHWAY  
PID IL2 1PATHWAY

## Bioinformatics analysis of membranous nephropathy

response to selenium ion  
regulation of nucleotide biosynthetic process  
nucleobase-containing compound catabolic process  
organophosphate biosynthetic process  
response to electrical stimulus  
RNA Polymerase III Transcription Termination  
organ growth  
striated muscle tissue development  
regulation of cellular response to stress  
Blood clotting cascade  
Regulation of necroptotic cell death  
Epithelial cell signaling in Helicobacter pylori infection  
Sudden infant death syndrome (SIDS) susceptibility pathways  
ribose phosphate metabolic process  
positive regulation of small molecule metabolic process  
positive regulation of blood circulation  
IL-17 signaling pathway  
metanephric tubule morphogenesis  
Oxidative stress response  
Neurotransmitter release cycle  
positive regulation of triglyceride metabolic process  
positive regulation of nuclear-transcribed mRNA poly(A) tail shortening  
Metabolic pathway of LDL, HDL and TG, including diseases  
regulation of fatty acid oxidation  
Transcriptional Regulation by MECP2  
Nuclear Events (kinase and transcription factor activation)  
positive regulation of cellular amine metabolic process  
positive regulation of transforming growth factor beta receptor signaling pathway  
Network map of SARS-CoV-2 signaling pathway  
Cobalamin (Cbl, vitamin B12) transport and metabolism  
Diseases associated with the TLR signaling cascade  
Transcriptional Regulation by TP53  
carboxylic acid transport  
ESR-mediated signaling  
regulation of purine nucleotide biosynthetic process  
development of primary sexual characteristics  
Biosynthesis of amino acids  
regulation of wound healing  
organic acid biosynthetic process  
Modulators of TCR signaling and T cell activation  
Complement system  
aromatic compound catabolic process  
purine nucleotide metabolic process  
cellular response to tumor necrosis factor  
NGF-stimulated transcription  
adaptive thermogenesis  
ADP metabolic process  
negative regulation of ATP metabolic process  
cellular response to salt stress  
phosphatidylinositol-mediated signaling  
complement activation  
regulation of cholesterol metabolic process  
positive regulation of endopeptidase activity

## Bioinformatics analysis of membranous nephropathy

|      |     |                                                                       |
|------|-----|-----------------------------------------------------------------------|
|      |     | protein homooligomerization                                           |
|      |     | cGMP-mediated signaling                                               |
|      |     | Fatty acid metabolism                                                 |
|      |     | gonad development                                                     |
|      |     | Mitotic G1 phase and G1/S transition                                  |
|      |     | regulation of tube size                                               |
|      |     | foxo signaling pathway                                                |
|      |     | left/right pattern formation                                          |
|      |     | secondary metabolic process                                           |
|      |     | glutamine family amino acid metabolic process                         |
|      |     | pyridine-containing compound metabolic process                        |
|      |     | electron transport chain                                              |
|      |     | Galanin receptor pathway                                              |
|      |     | response to starvation                                                |
|      |     | circulatory system process                                            |
|      |     | dopamine metabolic process                                            |
|      |     | negative regulation of intracellular signal transduction              |
|      |     | small molecule catabolic process                                      |
|      |     | cellular response to monosaccharide stimulus                          |
|      |     | metanephric nephron epithelium development                            |
|      |     | organic acid transmembrane transport                                  |
|      |     | glycine metabolic process                                             |
|      |     | sulfur compound transport                                             |
|      |     | cellular glucose homeostasis                                          |
|      |     | positive regulation of steroid biosynthetic process                   |
|      |     | nephron morphogenesis                                                 |
|      |     | Antiviral and anti-inflammatory effects of Nrf2 on SARS-CoV-2 pathway |
|      |     | cellular respiration                                                  |
|      |     | vitamin metabolic process                                             |
|      |     | animal organ formation                                                |
|      |     | Transcription factor regulation in adipogenesis                       |
|      |     | Interferon alpha/beta signaling                                       |
| PBMC | 252 | autophagosome assembly                                                |
|      |     | Adaptive Immune System                                                |
|      |     | production of miRNAs involved in gene silencing by miRNA              |
|      |     | Macroautophagy                                                        |
|      |     | sphingoid metabolic process                                           |
|      |     | spermatogenesis                                                       |
|      |     | regulation of receptor recycling                                      |
|      |     | protein polyubiquitination                                            |
|      |     | regulation of translation                                             |
|      |     | amyloid-beta formation                                                |
|      |     | Inclusion body myositis                                               |
|      |     | DNA repair                                                            |
|      |     | dorsal/ventral pattern formation                                      |
|      |     | Malignant pleural mesothelioma                                        |
|      |     | regulation of protein ubiquitination                                  |
|      |     | Membrane Trafficking                                                  |
|      |     | Alzheimer's disease                                                   |
|      |     | positive regulation of telomerase activity                            |
|      |     | lncRNA in canonical Wnt signaling and colorectal cancer               |
|      |     | Interleukin-1 induced activation of NF-κB                             |
|      |     | Autophagy                                                             |

## Bioinformatics analysis of membranous nephropathy

protein folding  
MAPK family signaling cascades  
Cellular response to starvation  
protein localization to nucleus  
regulation of JUN kinase activity  
establishment of vesicle localization  
Alzheimer's disease and miRNA effects  
sphingosine metabolic process  
Ciliary landscape  
negative regulation of translation  
Nuclear Envelope Breakdown  
peptidyl-serine modification  
regulation of GTPase activity  
male meiotic nuclear division  
T41 mutants of beta-catenin aren't phosphorylated  
regulation of embryonic development  
RNA polymerase II preinitiation complex assembly  
H19 action Rb-E2F1 signaling and CDK-Beta-catenin activity  
Golgi organization  
regulation of vascular endothelial growth factor receptor signaling pathway  
negative regulation of protein-containing complex disassembly  
Ca<sup>2+</sup> pathway  
nucleobase-containing compound transport  
VEGFA-VEGFR2 Pathway  
pigment granule transport  
S33 mutants of beta-catenin aren't phosphorylated  
T cell receptor and co-stimulatory signaling  
WNT SIGNALING  
Signaling by APC mutants  
Disassembly of the destruction complex and recruitment of AXIN to the membrane  
mRNA processing  
regulation of DNA metabolic process  
cell junction assembly  
Canonical and non-canonical Notch signaling  
Ion transport by P-type ATPases  
response to heat  
mTORC1-mediated signalling  
protein K48-linked ubiquitination  
ncRNA metabolic process  
Amino acids regulate mTORC1  
melanosome transport  
amyloid precursor protein catabolic process  
mRNA metabolic process  
modification-dependent protein catabolic process  
cellular response to leukemia inhibitory factor  
regulation of chromosome organization  
Protein processing in endoplasmic reticulum  
Signaling by AMER1 mutants  
Fc epsilon receptor (FCER1) signaling  
positive regulation of transmembrane transport  
pigment granule localization  
mRNA splicing, via spliceosome  
regulation of mitotic cell cycle



## Bioinformatics analysis of membranous nephropathy

peptidyl-serine phosphorylation  
male gamete generation  
protein refolding  
amyloid precursor protein metabolic process  
Antigen processing: Ubiquitination & Proteasome degradation  
Factors and pathways affecting insulin-like growth factor (IGF1)-Akt signaling  
Cohesin complex-Cornelia de Lange syndrome  
positive regulation of protein localization to nucleus  
skeletal system morphogenesis  
positive regulation of nucleocytoplasmic transport  
meiotic cell cycle  
determination of bilateral symmetry  
positive regulation of cell cycle  
PID FAK PATHWAY  
S37 mutants of beta-catenin aren't phosphorylated  
phospholipid dephosphorylation  
vacuole organization  
diol metabolic process  
import into nucleus  
regulation of cellular protein localization  
positive regulation of DNA metabolic process  
Signaling by GSK3beta mutants  
response to leukemia inhibitory factor  
Degradation of AXIN  
Gastric cancer network 2  
PID MET PATHWAY  
transport across blood-brain barrier  
COPII-coated vesicle budding  
negative regulation of transport  
fibroblast apoptotic process  
regulation of nuclear division  
MAPK1/MAPK3 signaling  
RNA splicing  
regulation of RNA splicing  
Regulation of Wnt/B-catenin signaling by small molecule compounds  
alcohol biosynthetic process  
modulation of chemical synaptic transmission  
regulation of trans-synaptic signaling  
ubiquitin-dependent protein catabolic process  
Energy dependent regulation of mTOR by LKB1-AMPK  
nucleus organization  
response to unfolded protein  
APC truncation mutants have impaired AXIN binding  
post-embryonic development  
regulation of neuron projection regeneration  
glial cell development  
specification of symmetry  
positive regulation of amyloid precursor protein catabolic process  
RHOQ GTPase cycle  
metanephros development  
Cell Cycle  
limbic system development  
production of small RNA involved in gene silencing by RNA

## Bioinformatics analysis of membranous nephropathy

RHOJ GTPase cycle  
ncRNA processing  
proteolysis involved in cellular protein catabolic process  
postsynaptic modulation of chemical synaptic transmission  
regulation of mitochondrial gene expression  
Extracellular vesicle-mediated signaling in recipient cells  
vesicle localization  
brain development  
Cell Cycle, Mitotic  
melanosome localization  
G2/M Transition  
segmentation  
Diseases of signal transduction by growth factor receptors and second messengers  
MTOR signalling  
nuclear membrane organization  
positive regulation of telomere maintenance via telomerase  
Golgi vesicle transport  
regulation of mitochondrial translation  
negative regulation of defense response  
Class I MHC mediated antigen processing & presentation  
Metabolism of RNA  
heterotypic cell-cell adhesion  
Signaling by the B Cell Receptor (BCR)  
L-glutamate import  
phosphatidylinositol dephosphorylation  
telencephalon development  
DARPP-32 events  
mitotic cell cycle phase transition  
C-type lectin receptors (CLRs)  
mitotic cell cycle checkpoint signaling  
ncRNAs involved in Wnt signaling in hepatocellular carcinoma  
cellular response to DNA damage stimulus  
regulation of intracellular transport  
EPH-ephrin mediated repulsion of cells  
regulation of mRNA metabolic process  
G protein signaling pathways  
S45 mutants of beta-catenin aren't phosphorylated  
PID BETA CATENIN NUC PATHWAY  
PCP/CE pathway  
regulation of protein import  
establishment of pigment granule localization  
chorion development  
L-glutamate transmembrane transport  
mTOR signaling pathway  
diol biosynthetic process  
Beta-catenin independent WNT signaling  
RAF/MAP kinase cascade  
PID IL8 CXCR2 PATHWAY  
regulation of protein import into nucleus  
PIWI-interacting RNA (piRNA) biogenesis  
Long-term depression  
dsRNA processing  
establishment of protein localization to organelle

## Bioinformatics analysis of membranous nephropathy

Signaling by AXIN mutants  
receptor recycling  
regulation of inclusion body assembly  
PTK6 Regulates RHO GTPases, RAS GTPase and MAP kinases  
extraembryonic membrane development  
response to amphetamine  
Regulated proteolysis of p75NTR  
negative regulation of organelle organization  
positive regulation of protein import into nucleus  
RNA splicing, via transesterification reactions with bulged adenosine as nucleophile  
RNA splicing, via transesterification reactions  
Downstream signaling events of B Cell Receptor (BCR)  
Truncations of AMER1 destabilize the destruction complex  
positive regulation of protein import  
acidic amino acid transport  
PID WNT CANONICAL PATHWAY  
Kisspeptin/kisspeptin receptor system in the ovary  
Synthesis of PIPs at the early endosome membrane  
HSP90 chaperone cycle for steroid hormone receptors (SHR) in the presence of ligand  
positive regulation of DNA biosynthetic process  
gamete generation  
vesicle-mediated transport to the plasma membrane  
cellular pigmentation  
spinal cord development  
L-glutamate import across plasma membrane  
multivesicular body sorting pathway  
Ubiquitin mediated proteolysis  
PI Metabolism  
MET in type 1 papillary renal cell carcinoma  
Chaperone Mediated Autophagy  
protein import into nucleus  
negative regulation of lipid biosynthetic process  
Degradation of beta-catenin by the destruction complex  
Mesodermal commitment pathway  
nuclear transport  
Signaling by WNT  
Renal cell carcinoma  
Signaling by EGFR in Cancer  
proteasomal protein catabolic process  
negative regulation of cellular amide metabolic process  
astrocyte activation  
establishment of melanosome localization  
Wnt/beta-catenin signaling pathway in leukemia  
regulation of proteolysis involved in cellular protein catabolic process  
Mitotic G2-G2/M phases  
PID MYC ACTIV PATHWAY  
somitogenesis  
hyaluronan metabolic process  
vesicle budding from membrane  
Mitochondrial gene expression  
Signaling by CTNNB1 phospho-site mutants  
PID BETA CATENIN DEG PATHWAY  
PID ECADHERIN KERATINOCYTE PATHWAY

## Bioinformatics analysis of membranous nephropathy

PID ANGIOPOIETIN RECEPTOR PATHWAY

nucleocytoplasmic transport

Rab regulation of trafficking

EGFR tyrosine kinase inhibitor resistance

synaptic vesicle cycle

AXIN missense mutants destabilize the destruction complex

modification-dependent macromolecule catabolic process

protein-containing complex disassembly

positive regulation of establishment of protein localization

protein import

membrane protein ectodomain proteolysis

Sphingolipid pathway

Signaling by WNT in cancer

TCF dependent signaling in response to WNT

regulation of transcription elongation from RNA polymerase II promoter

vascular transport

vesicle cargo loading

Beta-catenin phosphorylation cascade

regulation of cellular protein catabolic process

---
